**Title:**

**A novel system for maintaining *Varroa destructor* mites on artificial diets and its application for studying mites as a vector for honey bee viruses**

**Authors:**

Francisco Posada-Florez<sup>\*1</sup>, Eugene V. Ryabov<sup>\*1</sup>, Matthew C. Heerman<sup>1</sup>, Yanping Chen<sup>1</sup>, Jay D. Evans<sup>1</sup>, Steven C. Cook,<sup>\*1</sup> and Daniel E. Sonenshine<sup>\*1, 2</sup>

**Affiliation:**

<sup>1</sup> USDA, ARS Bee Research Laboratory, Beltsville Agricultural Research Center, Beltsville, MD 20705, USA

<sup>2</sup> Department of Biological Sciences, Old Dominion University, Norfolk, VA 23529, USA

**\*Corresponding authors:**

Steven C. Cook ([steven.cook@usda.gov](mailto:steven.cook@usda.gov))

Daniel E. Sonenshine ([dsonensh@odu.edu](mailto:dsonensh@odu.edu), [daniel.sonenshine@usda.gov](mailto:daniel.sonenshine@usda.gov))

Francisco Posada-Florez ([francisco.posada@usda.gov](mailto:francisco.posada@usda.gov))

Eugene V. Ryabov ([eugene.ryabov@gmail.com](mailto:eugene.ryabov@gmail.com))

## Abstract

The mite *Varroa destructor* is one of the most destructive parasites of the honey bee (*Apis mellifera*) and the primary cause of colony collapse in most regions of the world. These mites cause serious injury to their hosts, especially during the larval and pupal stages, and serve as the vector for several viruses, which affect honey bee health causing colony death. Attempts by beekeepers to control these mites have yielded limited success. The inability to rear populations of mites *in vitro* that excludes contact with their honey bee hosts has stymied research of *Varroa* biology. Previous attempts to rear and/or maintain *Varroa* mites *in vitro* by feeding them on artificial diets have had limited success. Several methods were plagued by mechanical failures including leaking membranes and, thus far, none have been widely adopted. Here we report a robust system for maintaining *Varroa* mites that includes an artificial diet, which does not contain honey bee tissue-derived components, thus making it particularly valuable in studying mite vectoring of honey bee viruses. With our system we demonstrated for the first time that *Varroa* mites maintained on an artificial diet supplemented with the particles of honey bee viruses, cDNA clone-derived genetically tagged *Varroa destructor* virus-1 and wild-type Deformed wing virus, can acquire and later transmit these viruses to recipient honey bee pupae. Along with providing an opportunity to study parasites and pathogens in the absence of honey bee hosts, this *in vitro* system for *Varroa* mite maintenance is both scalable and consistent. These features can be used to better understand mite nutritional needs, metabolic activity, responses to chemicals and other biological functions.

**Key words.** *Apis mellifera*, Iflavirus, *Varroa destructor* virus-1 (VDV1), Deformed wing virus, infectious viral cDNA clone for VDV1, DWV-B, virus vector, parafilm sachet, artificial diet, *in vitro* rearing

## Introduction

The ectoparasitic mite, *Varroa destructor* (Anderson and Trueman) (Acari: Varroidae), is believed to be the major factor in the widespread collapse of honey bee colonies in North America as well as many parts of Europe and Asia [1]. Attempts by beekeepers to control *Varroa* mites have had only limited success [2, 3]. Consequently, there is a need to find new methods to control these parasites without harming the host bees. Unfortunately, efforts to gain a better understanding of the biology of *Varroa* have been stymied by the lack of a ready supply of mites along with a repeatable system for maintaining and/or rearing populations of mites for research purposes. Attempts to rear *Varroa* mites on liquid artificial diets have been the subject of intense investigation since the 1980's [4, 5]. Honey bee host pupae, the only life stage suitable for mite reproduction, are not available during the fall and winter in temperate areas, including most of the USA and Europe, and natural populations of *Varroa* mites do not arrive at sufficient levels needed for scientific studies until late summer [6]. Successful rearing, or even long-term maintenance, of mite populations would greatly facilitate research on disease transmission, metabolism, reproduction, and the evaluation of control methods.

There have been several attempts to rear populations of *Varroa* mites *in vitro* using artificial diets. Perhaps the first successful attempt to feed *Varroa* on an artificial diet was reported by Bruce et al. [4], who stretched a thin (~10 µm) parafilm membrane containing a dietary medium over modified queen cells, which are used for queen-rearing. Mites were observed to survive for up to 120 h, and many mites also laid eggs. However, this system was plagued by evaporation and contamination of the diet. Further modifications to this system using queen rearing cells covered with parafilm minimized leakage and were successful for maintaining a number of the much smaller tracheal mite, *Acarapis woodi* [7]. Later, Talbart et al. [5] produced synthetic chitosan membranes for holding an artificial diet with which to

rear *Varroa* mites but this system also had limited success and has not yet been adopted by other researchers. This issue is likely due to earlier systems that required relatively complex components; only a few devices could be manufactured at a time, with the result that tests were done with very few mites [5, 8]. Attempts to reproduce these published methods revealed many setbacks (authors' unpubl. data), especially related to membrane leakage, which drowned the mites. These physical limitations made it difficult, if not impossible to carry out repeatable tests for research. Because a system for rearing populations of *Varroa* mites *in vitro* remains elusive, a system is still needed for maintaining sufficient numbers of mites for research purposes.

The success of maintaining *Varroa* mites on artificial diets for research purposes depends upon three major issues: 1) availability of numerous healthy adult female mites; 2) the composition of the artificial diet; and 3) a device and membrane system for housing mites and containing the diet, respectively. Unfortunately, sufficient numbers of *Varroa* mites for research remain seasonally restricted. Nonetheless, for further progress in maintaining large numbers of mites *in vitro* with artificial diets, the first task is to create a simple but reliable system that can allow mites housed in a device to have access to a diet that does not leak, evaporate or is prone to contamination [9]. The second task is to provide a membrane thin enough (10 to 15  $\mu\text{m}$ ), to allow *Varroa* mites to reach the diet with their mouthparts, which are very short [10]. Finally, methods must contain a sufficient volume of liquid to feed mites for many days or even weeks without compromising the quality and/or integrity of the diet. In this report, we describe a robust system including a membrane based on that of Avila and colleagues [11] for maintaining large numbers of *Varroa* mites numbers on completely host-free diets. Further, we validate the system's utility in an experiment of *Varroa* mite vectoring of honey bee viruses, specifically, the novel cDNA clone-derived *Varroa destructor virus-1* (VDV1 or DWV-B).

## Materials and Methods

**V-BRL Diet.** The artificial diet, hereafter termed the V-BRL (Varroa-Bee Research Lab) diet was based on Tabart et al. and Bruce et al. [4, 5]. Briefly, the diet included 30% Schneider's medium, 30% CMRL-1000, 1% Hanks salt solution (without NaCO<sub>3</sub>, CaCl or MgSO<sub>4</sub>), 10% bovine serum, 4% Insect medium supplement (cell culture type), 10% TC-100 Insect medium (with glutamine and NaCO<sub>3</sub>) and 15% sterile water (all from Sigma-Aldrich, St. Louis MO). To minimize contamination, fresh diet was prepared in a fume hood and stored frozen (-20 °C) in small aliquots. No antibiotics or antifungal agents were included to avoid compromising microbiota that may provide essential nutrients for mite nutrition, since species of *Diplorickettsia*, *Arsenophonus*, *Morganella*, *Spiroplasma*, *Enterococcus*, and *Pseudomonas* have been reported to inhabit *Varroa* mites [12].

**Varroa mites.** The sugar roll method [13] was used to collect phoretic mites from honey bee colonies that had not received miticidal applications. Following collection, and after rinsing mites with tap water, they were placed on petri dishes lined with dry tissue paper. Mites were checked for activity prior to experimental selection, and only active mites used.

**Device and membrane.** Snap-cap polypropylene 1.5 mL microcentrifuge tubes were chosen for constructing the device housing the mites (Fig 1). The tubes were cut crosswise at the point that allowed a 1 cm diameter opening. Cut surfaces were smoothed with sandpaper to avoid damaging the parafilm (American National Can Company, NY) membranes that would later be attached. Prior to using the devices, while wearing sterile nitrile gloves, containers were transferred to a laminar flow hood, disinfected for 2 min with 1.0 % bleach, followed directly by 2 min in 70 % ethanol, then 2 min rinsing in sterile water and then exposed for 1 h to ultraviolet

light. Following disinfection and while still in the laminar flow hood, each device was covered with a thin sheet of sterilized parafilm stretched to  $16.6 \pm 5.86 \mu\text{m}$  and wrapped over the open end of the device. Membrane thickness was checked with a Marathon digital micrometer (Marathon Corp., Canada). Diet solution ( $10 \mu\text{L}$ ) was pipetted onto the center of the parafilm membrane, after which the membrane plus diet solution was covered with a second layer of sterile parafilm, forming the parafilm sachet [11, 14, 15]. The snap-cap lid on the other side of the device was opened to insert a female *Varroa* mite. Before closing, the lid was punctured with a sterile no. 1 stainless steel pin to form a minute hole (approximately 0.5 mm) to allow air to escape so the parafilm sachet would not rupture when the lid was snapped shut (Fig 1). The completed devices were placed in a dark incubator (Thermofisher Scientific, San Jose, CA) set at  $32.1 \pm 0.3 ^\circ\text{C}$ , and having  $82.2 \pm 1.3 \%$  relative humidity.

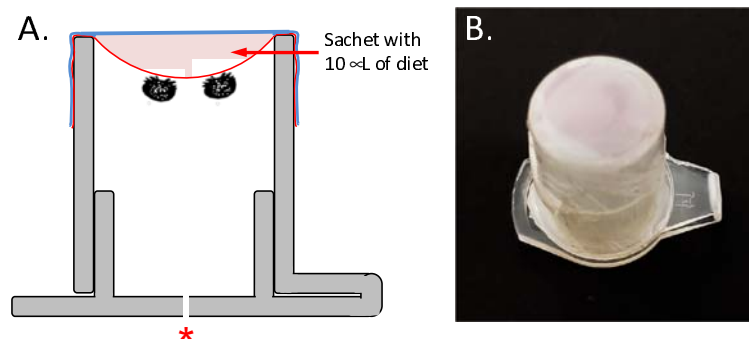

**Figure 1.** Details of the device and membrane sachet comprising the system used for maintaining *Varroa* mites during experiments. (A). Diagram showing the design of the device housing the mites. Arrow shows parafilm sachet with diet. Red asterisk indicates hole in the lid for air pressure relief. Two mites are shown attached to inner membrane to feed on diet. (B) Photo of the complete system, comprising the device housing the mites and attached parafilm sachet. The sachet is filled with  $10 \mu\text{L}$  of diet solution.

**Confirming mite feeding on the artificial diet.** Because mites defecate frequently when allowed to feed [16], the number of mite excretory deposits made on the parafilm membrane was recorded daily as a measure of mite feeding. Samples of diet solution contained  $10^4$  sterile fluorescent isothiocyanate (FITC) labeled beads from Thermofisher (Carlsbad, CA), to determine whether the mites had fed. Samples of mites were collected after they died, decontaminated with (70% ethanol) and examined with a Zeiss Axio Imager.M2 (Dublin, CA) microscope at 488 excitation/520 emission for fluorescent beads in their tissues as described previously [17]. In addition, the number of mite excretory deposits made each day was recorded using a Zeiss Axioskop 2 Plus compound microscope (Dublin, CA) to inspect the walls of the device and membrane.

**Tests of device performance and *Varroa* mite longevity.** Three trials to evaluate the system for maintaining mites were conducted. In the first trial, 10 replicates were prepared with three *Varroa* mites in each device. In the second trial, 10 replicates were prepared; six with three mites and four with 4 mites, for a total of 34 mites. In the third trial, 15 replicates were prepared; four devices with two mites, four with three mites and 7 with four mites each for a total of 42 mites. In each trial 10 $\mu$ L of diet plus beads were placed within the parafilm sachet. As a positive control for survival, female *Varroa* mites were allowed to feed on honey bee pupae. Pupae were collected from bee hives, placed in clear gelatin capsules (Capsuline, Pompano Beach, FL) with several mites, and mite and bee survival were monitored daily. Pupae were replaced after 3–4 days with fresh bee pupae to ensure that the pupal hosts had not deteriorated, transformed into an adult bee, or were otherwise unsuitable, as described previously [18]. As a negative control for mite survival, mites were housed in devices but membrane sachets contained only water. Replicate devices and controls were incubated as described above. Mite mortality was recorded daily. Also, devices were checked daily for

leakage of the diet, or whether air bubbles or other obstructions blocked access to the diet.

Finally, the diet was inspected for contamination and evaporation as described previously [9].

### **Design of infectious cDNA clone of *Varroa destructor* virus-1 (VDV1 ) and production of**

**clone-derived inocula.** We designed a full-length infectious cDNA clone of a Californian isolate of VDV1, GenBank Accession number MN249174 (S1 Text, S2 Text). The cDNA had an introduced genetic marker, an *AsiSI* restriction site at the position 277 nt, which distinguished clone-derived VDV1 from wild-type VDV1 strains allowing us to trace transmission of this VDV1 isolate (S2 Text). The VDV1 cDNA clone and clone-derived infectious virus particles were produced using previously described approach [19], and detailed in S1. In brief, the full-length cDNA clone of the virus was produced using total RNA from honey bees sourced from California in 2016 (isolate CA-07-2016) which showed high VDV1 and low DWV levels [20]). Two overlapping cDNA fragments amplified by RT-PCR using specific primers, and the synthetic gene corresponding to the 277 nt 5' part of the genomic RNA were assembled in a plasmid vector (S1 Table; S1 Text). The resulting full-length VDV1 cDNA plasmid construct was used to prepare the template for *in vitro* transcription. To produce clone-derived VDV1 inoculum, the purified *in vitro* RNA full-length VDV1 transcript generated using the linearized VDV1 cDNA plasmid was injected into the hemolymph of purple eye honey bee pupae. Pupae were incubated 4 days at +33°C (82.2 ± 1.3% relative humidity) to allow propagation of the clone-derived virus infection. Tissue extracts containing the clone-derived VDV1 virus particles were collected by homogenizing infected pupae in PBS, and then filtering the supernatant through a 0.22µm nylon syringe filter (ThermoFisher, Waltham, MA) to remove host-derived cellular materials. The VDV1 extract introduced to the *Varroa* diet contained the clone-derived



VDV1 ( $1.7 \times 10^8$  per  $\mu\text{L}$ ) and background wild-type DWV derived from the recipient pupae ( $1.6 \times 10^5$  per  $\mu\text{L}$ ), see S1 text for additional details.

**Acquisition of viruses by *Varroa* mites from artificial diet.** The filtered tissue extract introduced to the *Varroa* diet contained virus particles of the clone-derived VDV1 at a concentration of  $1.7 \times 10^8$  genome equivalents/ $\mu\text{L}$  and background wild-type DWV derived from the recipient pupae used for recovery of a clone-derived VDV1 at a concentration of  $1.6 \times 10^5$  genome equivalents/ $\mu\text{L}$ . We supplemented the artificial diet with filtered PBS tissue extract containing particles of the cDNA clone-derived VDV1 and wild-type DWV (80% diet, 20% filtered PBS tissue extract), Fig 2. The virus-supplemented diet contained  $3.3 \times 10^7$  genome equivalents of the clone-derived VDV1 and  $3.2 \times 10^4$  genome equivalents of wild-type DWV per  $\mu\text{L}$  diet. The diet supplemented with PBS (80% diet, 20% PBS) containing no tissue extract was used as a control.

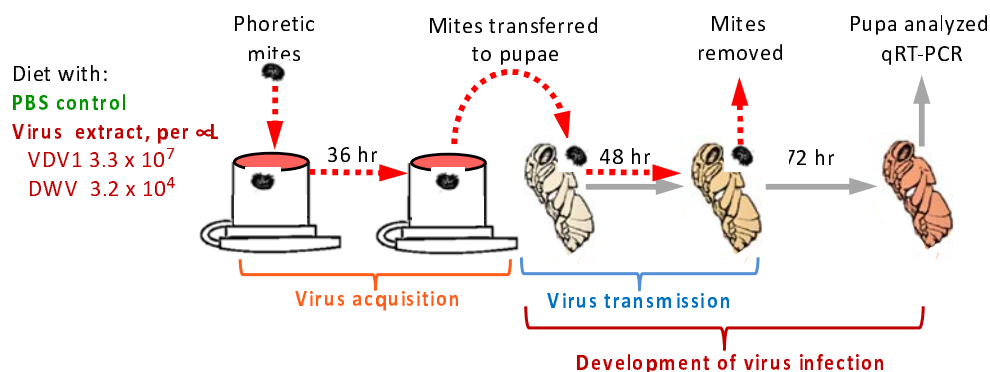

**Figure 2.** Application of the developed system for studying the vectoring of honey bee viruses by *Varroa* mites. Schematic representation of the experimental design. Mites were allowed to feed for 30 h either on the diet contained cDNA clone derived particles of

VDV1,  $3.3 \times 10^7$  genome equivalents per  $\mu\text{L}$ , and wild-type DWV,  $3.2 \times 10^4$  genome equivalents per  $\mu\text{L}$ , or on the control diet containing PBS free of viral particles.

**Transmission of the acquired viruses to honey bee pupae.** Following the 36h acquisition period the surviving mites were placed individually on a pink-eyed honey bee pupa housed gelatin capsules and placed in a dark incubator (see above) for 48h to allow for the transmission of the virus to the pupae. Pupae were then incubated for an additional 72h to allow virus replication (Fig 2). To determine whether viral transmission occurred, total RNA was extracted from each of pupae from the experimental (n=15) and control (n=9) treatment groups, then extracts subject to RT-qPCR to quantify copy numbers of VDV1 and DWV genomic RNA and assess transcription levels of honey bee actin by RT-qPCR using the primers described in S1 Table as in [20]. To further demonstrate that VDV1 detected in the pupae derived from the clonal cDNA virus acquired by the mites from the artificial diet, the RT-PCR fragment corresponding to the 5' terminal 1200 nt was digested with the *AsiSI* restriction enzyme. The digested and undigested PCR fragments were separated by electrophoresis in 1.2 % agarose gel and visualized using ethidium bromide staining.

**Data analysis.** The integrity of the device and diet were monitored and recorded using Zeiss Axio camera attached to a stereoscopic microscope. The survival of the mites on the diet was analyzed using a Kaplan-Meier test (JMP, version 12, SAS, Cary, NC). Other variables included the number of fecal pellets deposited per day, and the number of viral replicates in pupae after *Varroa* mite transmission were analyzed using ANOVA or *t*-tests.

## Results

**Device, membrane and mite survival.** The feeding device (Fig 1) allowed *Varroa* mites to feed on the artificial diet without honey bee-derived components through a ~10 µm parafilm membrane. No evidence of diet leakage, evaporation or contamination, or other mechanical failures precluding mite's access to the diet was recorded. We compared survival of mites from the three trials having devices with parafilm sachets containing the V-BRL artificial diet against survival of mites from both the positive and negative control groups (Fig 3; S2 Table). In contrast to diet fed-mites, most mites survived up to 25 days while feeding on bee pupae. Mite survival declined precipitously after day 10. The average survival time while feeding on pupae was 9.42 days (Fig 3, green dotted line). We found that mites began dying within 6h after confinement in the artificial feeding device without diet. Of the 32 mites held in the container without food (negative control group), all but two were dead within one day; the remaining two died by day two (Fig 3, black dotted line). Notably, mites incubated in the devices containing water deposited only minute amounts of excreta, indicating a lack of feeding. Contrary to poor survival by the mites in devices containing water (mean survival time  $\pm$  standard error:  $1.06 \pm 0.04$  days), mites survived for significantly long periods when kept in the devices containing diet (Fig 3, solid lines).

Three trials each involving 10 diet chambers, involving 30 to 42 mites in total in each trial, were carried out (Fig 3, Table 1; S2 Table), with mean survival times  $\pm$  standard error for three trials were  $1.70 \pm 0.12$ ,  $2.35 \pm 0.35$ , and  $2.07 \pm 0.20$  days. In the first trial, mites survived for up to 4 days (d); slightly more than 60% survived 1 d, 10% survived 2 d, and the remainder survived 3 d. In the second trial, 82% survived 1 d, 48 % survived 2 d, 5% survived 3 d and 1% 4 d. In the third trial, 48% survived 1 d, 39% survived 2 d, 20% survived 3 d, 3% survived 4 d, and none survived 5 d. The longevity of mites did not depend on the number of mites housed in the devices (data not shown).

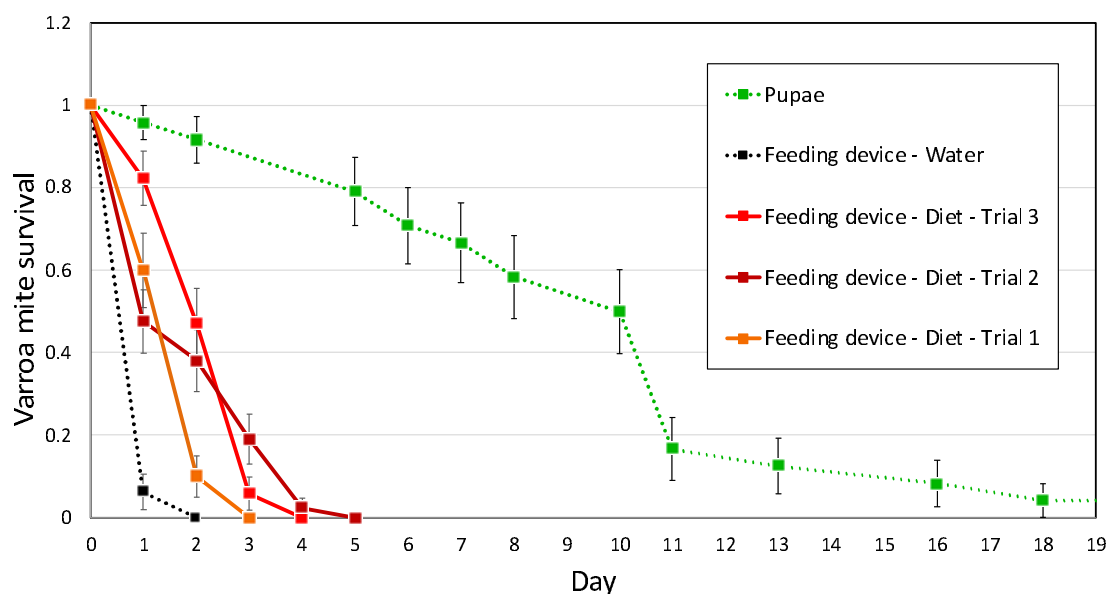

**Figure 3.** Survival of *Varroa* mites on the artificial diet during 3 separate trials compared to mites feeding on honey bee pupae and a negative control. Survival curves are shown for 3 separate diet trials (orange, red and dark red lines) compared to mites feeding on honey bee pupae (green dotted line) and mites without a food source (black dotted line). Data points on the graph represent the mean percent survival ( $\pm$  std. error) in days for each trial.

**Table 1.** Mean percent survival ( $\pm$  std. error) for *Varroa* mites reared on honey bee pupae, artificial diet, or water in the feeding devices. The statistical significance of the results was determined by the Wilcoxon Chi-square test ( $P < 0.001$ , Chi square = 84.49).

| Treatment group                   | Number of mites | Mean survival time<br>(days) | Standard error |
|-----------------------------------|-----------------|------------------------------|----------------|
| Pupae (gelatin capsule)           | 23              | 9.42                         | 0.90           |
| Feeding device -<br>Water         | 32              | 1.06                         | 0.04           |
| Feeding device -<br>Diet -Trial 1 | 30              | 1.70                         | 0.12           |
| Feeding device -<br>Diet -Trial 2 | 34              | 2.35                         | 0.15           |
| Feeding device -<br>Diet -Trial 3 | 42              | 2.07                         | 0.20           |

Evidence for mite feeding was supported by finding numerous mite excretory deposits (Fig 4A, S3 Table) and the finding of FITC-labeled fluorescent beads in excreta of the mites fed on the bead-containing diet (Fig 4B) but not in excreta for those feeding diet without fluorescent beads (Fig 4 C). The daily average deposition of excreta was  $2.55 \pm 0.52$  deposits per mite. Statistical analysis of the excreta data for each of the four days showed that the differences in excreta per live mite per day were not statistically significant (one-way ANOVA,  $P = 0.3797$ , Fig 4 D).

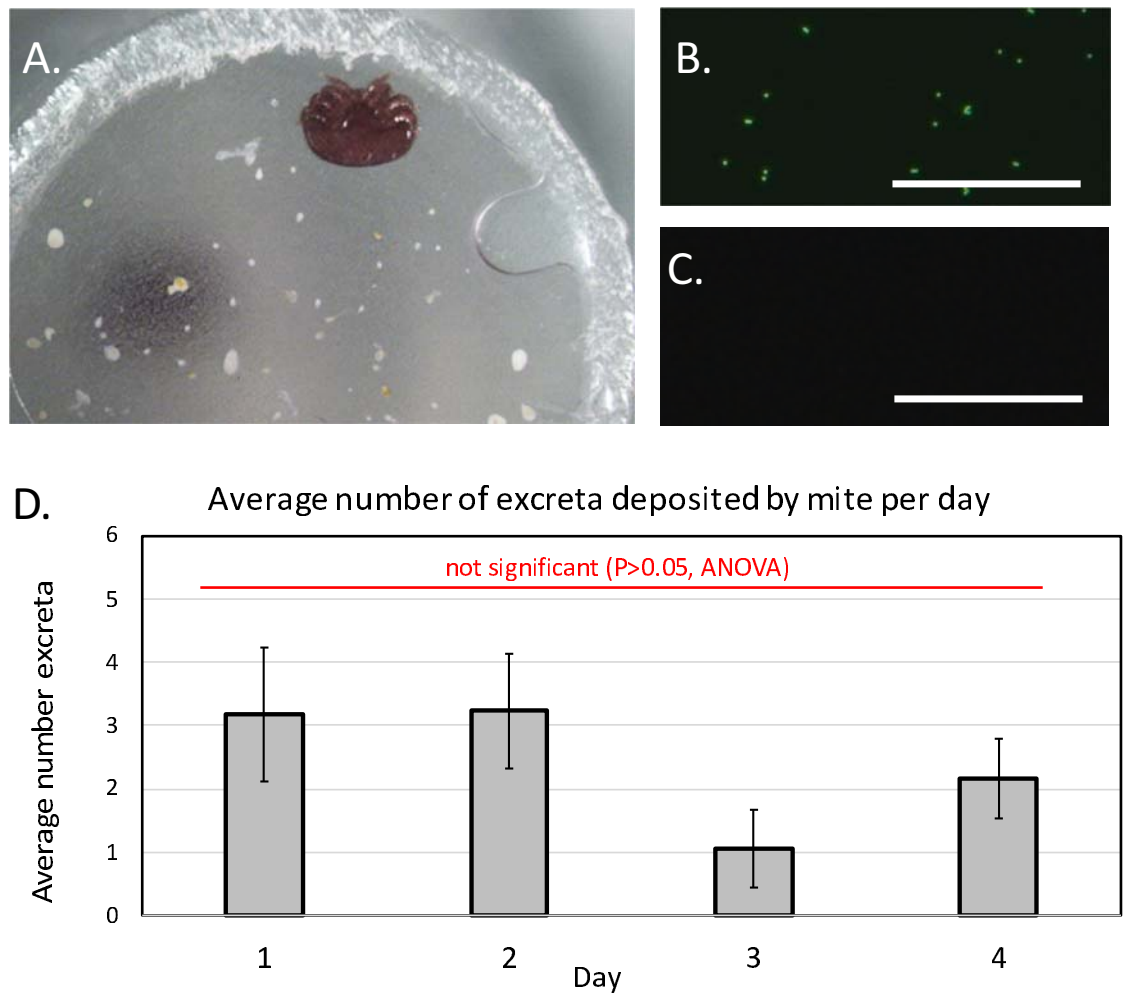

**Figure 4.** Evidential support of *Varroa* mites feeding on artificial diets. (A) Photograph shows the parafilm membrane with a live mite attached and numerous excretory deposits. (B) Micrograph showing fluorescent microbeads in mite feces collected from devices housing mites provided diet containing microbeads. (C) Micrograph showing no fluorescent microbeads in mite feces collected from devices housing mites provided diet containing no microbeads. (D) The mean ( $\pm$  se) total daily number of excretions deposited by mites on the membrane sachet. Measurement bar = 50  $\mu$ M.

### **Evidence of acquisition of viruses by mites and transmission to honey bee pupae.**

There was no statistically significant difference in the survival of mites fed on the diet containing the viruses versus mites fed on the control diet over a 72-h study period (S1 Fig, S4 Table, S5 Table). While there was no significant difference between the levels of honey bee actin mRNA in the treatment and control groups ( $P=0.1395$ , S6 Table), the levels of DWV and VDV1 were statistically significantly higher in pupae exposed to virus-fed mites compared to those in the control group ( $P<0.01$  and  $P<0.001$  respectively; Fig 5A). One-way ANOVA of the virus accumulation in the control and treatment groups were highly significant, ( $P<0.01$ ) for DWV ( $F=11.83$ ,  $df=23$   $P=0.00234$ ; Cohen's  $d=1.473107$ , large effect size.), ( $P<0.001$ ) for VDV1 ( $F=17.95$ ,  $df=23$ ,  $P=0.00034$ , Cohen's  $d=2.009988$ , large effect size). Importantly, high levels of DWV and VDV1 exceeding  $10^9$  virus copies per pupa, were observed only in the treatment group. High levels of VDV1 were observed in 7 of 15 pupae of the treatment group pupae, while only one pupa developed high DWV levels in the control (Fig 5A). This result could be explained by a 1000-fold difference between the levels of DWV and VDV1 in the diets containing  $3.2 \times 10^4$  and  $3.3 \times 10^7$  genome equivalent per  $\mu\text{L}$  respectively.

We confirmed that VDV1 derived from the artificial diet replicated in the treatment group pupae to high levels based on the diagnostic *AsiSI* restriction site (Fig 5B). This restriction site was not present in the wild-type isolates of VDV1 or DWV (Fig 5B, lane “wt”). Further evidence showing that the VDV1 transmitted to pupae was the cDNA clone VDV1 acquired from the artificial diet comes from digesting the RT-PCR fragment corresponding to the 5' terminal 1200 nt with *AsiSI* restriction enzyme. All seven of the recipient pupae that developed high virus levels showed that the *AsiSI* site was present in VDV1 (Fig 5B). Notably, the sample isolated from the 27 pupae of the treatment group

contained high levels of both DWV and VDV1 (Table S5), but only VDV1 was digested as agarose gel analysis showed (Fig 5B, lane 27).

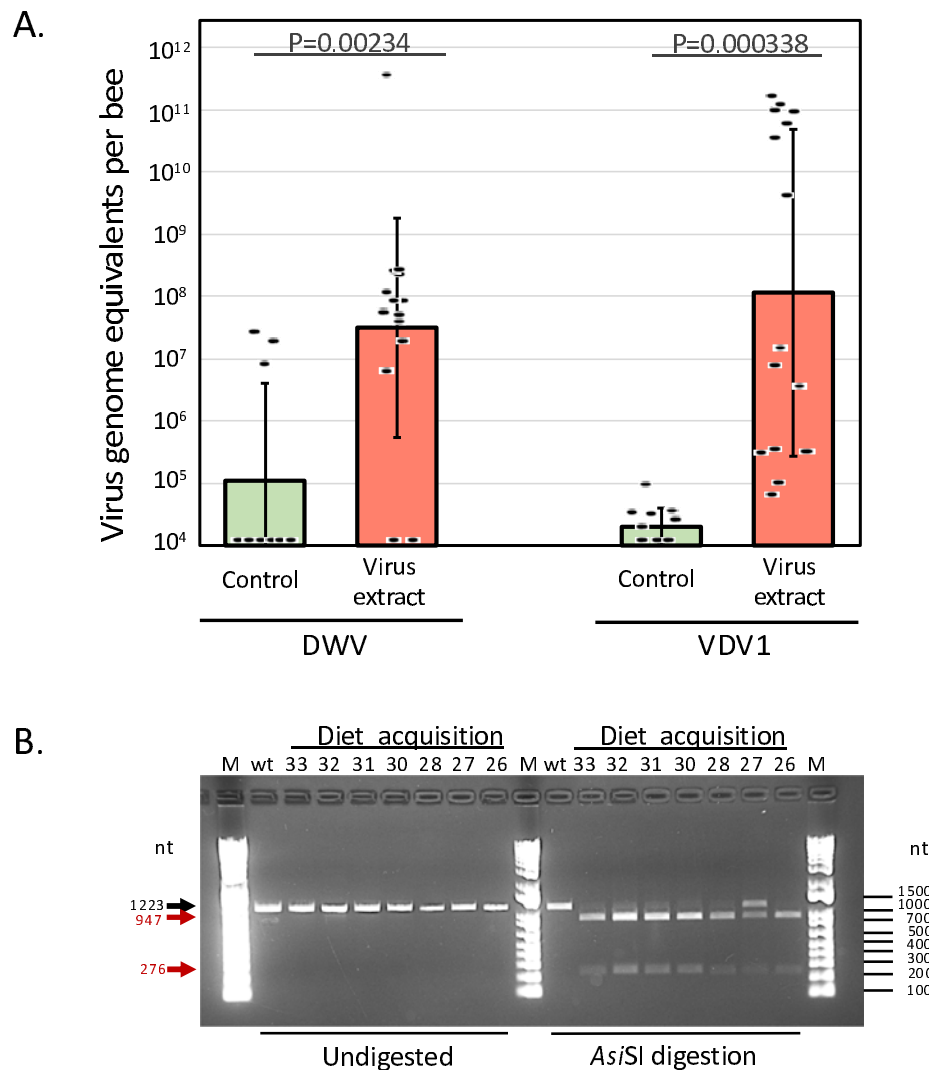

**Figure 5.** Transmission of VDV1 and DWV acquired by *Varroa* mites from artificial diet to honey bee pupae. (A) Levels of clone-derived VDV1 and wild-type DWV in honey bee pupae exposed to the *Varroa* mites which acquired virus from the diet. Black dots indicate virus load in individual honey bees. The columns show the average virus genome equivalent per  $\mu\text{L}$  numbers for each treatment  $\pm$  SD. Statistically significant differences (unpaired Student's t-test) are indicated above the bars. Numerical values underlying the summary graphs are provided in S6 Table. (B) To confirm the VDV1 clonal identity, the 1250 nt RT-PCR



fragments corresponding to the 5'-terminal region of DWV and VDV1 RNA genomes were amplified with the primers specific to both DWV and VDV1 using RNA extracts from the experimental pupae with the virus levels exceeding  $10^9$  genome copies from the “Virus extract” group (S6 Table), and from the wild-type VDV1 and DWV-infected pupae, “wt”. The undigested 1250 nt fragments (left) and *AsiSI*-digested (right). Expected fragment sizes, undigested (black arrow) and *AsiSI*-digested (red arrows), are shown on the left, DNA ladder sizes are shown on the right.

## Discussion

Here we describe a simple, but robust, system including an artificial diet, which was free of honey bee-derived components, that successfully maintained *Varroa* mites for a study of their vectoring of honey bee viruses to host pupae. In contrast to the previous artificial systems for rearing/maintaining *Varroa* mites, we used the accumulation of mite excreta and the presence of the fluorescent microbeads acquired from the diet in the excreta to confirm that mites had successfully fed through the membrane on the artificial diet. With this system, many mites survived consistently for 4 days (rarely, 7 days Posada et al unpublished), and an average longevity for up to five days, which is similar to the longevity of mites reported using other artificial systems [5]. The finding of live mites and excretory pellets on the parafilm membranes strongly suggests that the mites were feeding repeatedly on the diet, similar to the numerous excretory pellets found by Egekwu et al [18] for mites surviving on honey bee pupae. Notably, the greatest number of excretory deposits were found in the devices in which the mites survived the longest as supported by finding FITC-labeled fluorescent beads in the mite excreta. These findings show that *Varroa* mites can not only survive on the artificial diet, but also can remain vigorous and suitable for experiments of viral transmission such as the current study showing virus acquisition and transmission from diet to pupae. Thus, the

important question was not whether mites survived for long periods like those fed exclusively on pupae [18], but whether enough mites fed and survived during the period of the experiments in which they were used.

Our results with using the novel cDNA clone of genetically-tagged VDV1 also show that the acquisition period of 36 h was sufficient for *Varroa* mites feeding on the artificial diet to acquire sufficient numbers of viral particles to transmit them to the honey bee pupae, wherein they proliferated to high levels. No viral transmission to host pupae occurred subsequent to mites feeding on the control diet supplemented only with fluorescent beads. Although the results of our study showing viral transmission to honey bees by *Varroa* mites is not novel, here we show for the first time that virus particles of clonal VDV1 and DWV remained infectious in the artificial V-BRL diet long enough to be acquired by *Varroa* mites and subsequently transmitted to honey bee host pupae.

A significant challenge in this experiment was potential presence of viruses in both the recipient honey bee pupae and the *Varroa* mites sourced from the honey bee colonies maintained in apiaries known to harbor viruses. Therefore, it was also necessary to distinguish between the virus introduced through feeding on the diet and those that may have already been present either in the mites or in the recipient honey bee pupae. This challenge was resolved by using cDNA clone-derived VDV1 (also known as DWV-B) that was tagged with a rare *Asi*SI restriction enzyme site to differentiate it from the wild type (Fig 5B). The absence of pupae with high DWV and VDV1 levels (above  $10^9$  genome equivalents) in the control group (Fig 5A), i.e. by mites exposed to 36 h feeding on virus-free diet, was in agreement with the recent report by which indicated that DWV is vectored by *Varroa* mites via a non-persistent mechanical route [17].

The virus acquisition and subsequent transmission experiment presented in this report provides a “proof of concept” that validates the utility of the *in vitro* system for maintaining

*Varroa* mites for research purposes. We demonstrated that mites could acquire, and vector virus particles obtained from the filtered dietary suspension rather than only from living infected cells. Demonstrating mite transmission of viruses acquired from an artificial diet is particularly important in the light of the recent finding that *Varroa* mites ingest honey bee cells (including fat body cells) rather than just hemolymph [17, 22]. The described diet and experimental approach could be used to investigate *Varroa* vectoring of other honey bee viruses [23]. Feeding mites on a medium that is not derived from honey bees will provide definitive insights into which mite-vectoring viruses are capable of and/or persisting in their mite carriers. Finally, an important point of the system is the relative ease and manufacture of our artificial feeding device as it provides a convenient system to test mite survival when presented with a large variety of diet formulations. This is a significant improvement on the feeding devices described previously [4, 21].

## Acknowledgments

This research was supported in part by the United States Department of Agriculture (USDA) National Institute of Food and Agriculture (NIFA) grant 2017-06481 (EVR, YPC and JDE), and ORISE fellowship (FPF) and an APHIS-ARS interagency agreement (19-8130-0745-IA) (SCC and JDE). The funders had no role in study design, data collection and analysis, decision to publish, or preparation of the manuscript. USDA is an equal opportunity provider and employer.

## References

1. Nazzi F, Le Conte Y. Ecology of *Varroa destructor*, the Major Ectoparasite of the Western Honey Bee, *Apis mellifera*. Annual Review of Entomology 2016. p. 417-32.

2. Abbas N, Engels W. Rearing of Varroa in artificial cells on drones. Present Status of Varroaosis in Europe and Progress in the Varroa Mite Control Proc Meet EC Experts Group, Udine (Cavalloro R ed) CEC, Luxembourg. 1989:223-8.
3. Rosenkranz P, Aumeier P, Ziegelmann B. Biology and control of Varroa destructor. Journal of Invertebrate Pathology. 2010;103(SUPPL. 1):S96-S119.
4. Bruce W, Chiesa F, Marchetti S, Griffiths D. Laboratory feeding of Varroa jacobsoni Oudemans on natural and artificial diets (Acari: Varroidae). Apidologie. 1988;19(2):209-18.
5. Tabart J, Colin ME, Carayon JL, Tene N, Payre B, Vetillard A. Artificial feeding of Varroa destructor through a chitosan membrane: A tool for studying the host-microparasite relationship. Experimental and Applied Acarology. 2013;61(1):107-18.
6. Spivak M, Reuter GS. Honey Bee Diseases and Pests: University of Minnesota Extension Service; 2010.
7. Bruce W, Henegar R, Hackett K. An artificial membrane for in vitro feeding of Varroa jacobsoni and Acarapis woodi, mite parasites of honey bees. Apidologie. 1991;22(5):503-7.
8. Milani N, Chiesa F, editors. Suggestions for the artificial rearing of Varroa jacobsoni Oud. Proceeding of Meeting of Varroaosis in Europe and Progress in the Varroa mite control Cavalloro, R(ed); 1989.
9. Srivastava P, Auclair J. Effect of amino acid concentration on diet uptake and performance by the pea aphid, Acyrthosiphon pisum (Homoptera: Aphididae). The Canadian Entomologist. 1974;106(2):149-56.
10. Iovinella I, McAfee A, Mastrobuoni G, Kempa S, Foster LJ, Pelosi P, et al. Proteomic analysis of chemosensory organs in the honey bee parasite Varroa destructor: A comprehensive examination of the potential carriers for semiochemicals. Journal of Proteomics. 2018;181:131-41. doi: 10.1016/j.jprot.2018.04.009.

11. Avila L, Chandrasekar R, Wilkinson K, Balthazor J, Heerman M, Bechard J, et al. Delivery of lethal dsRNAs in insect diets by branched amphiphilic peptide capsules. *Journal of controlled release*. 2018;273:139-46.
12. Hubert J, Kamler M, Nesvorna M, Ledvinka O, Kopecky J, Erban T. Comparison of *Varroa destructor* and Worker Honeybee Microbiota Within Hives Indicates Shared Bacteria. *Microbial Ecology*. 2016;72(2):448-59. doi: 10.1007/s00248-016-0776-y.
13. Milbrath M. *Varroa* mite monitoring using a sugar roll to identify populations of *varroa destructor* in honey bee colonies. *American Bee Journal*. 2016;156(10):1119-22.
14. Dadd R, Krieger D, Mittler T. Studies on the artificial feeding of the aphid *Myzus persicae* (Sulzer)—IV. Requirements for water-soluble vitamins and ascorbic acid. *Journal of Insect Physiology*. 1967;13(2):249-72.
15. Akey DH, Beck SD. Continuous rearing of the pea aphid, *Acyrtosiphon pisum*, on a holidic diet. *Annals of the Entomological Society of America*. 1971;64(2):353-6.
16. Posada-Florez F, Sonenshine DE, Egekwu NI, Rice C, Lupitskyy R, Cook SC. Insights into the metabolism and behaviour of *Varroa destructor* mites from analysis of their waste excretions. *Parasitology*. 2018:1-6. doi: 10.1017/S0031182018001762.
17. Posada-Florez F, Childers AK, Heerman MC, Egekwu NI, Cook SC, Chen Y, et al. Deformed wing virus type A, a major honey bee pathogen, is vectored by the mite *Varroa destructor* in a non-propagative manner. *Scientific Reports*. 2019;9:12445. doi.org/10.1038/s41598-019-47447-3
18. Egekwu NI, Posada F, Sonenshine DE, Cook S. Using an in vitro system for maintaining *Varroa destructor* mites on *Apis mellifera* pupae as hosts: studies of mite longevity and feeding behavior. *Experimental and Applied Acarology*. 2018;74(3):301-15.
19. Ryabov EV, Childers AK, Lopez D, Grubbs K, Posada-Florez F, Weaver D, et al. Dynamic evolution in the key honey bee pathogen deformed wing virus: Novel insights into virulence and competition using reverse genetics. *PLOS Biology*. 2019;17(10):e3000502. doi: 10.1371/journal.pbio.3000502.

20. Ryabov EV, Childers AK, Chen Y, Madella S, Nessa A, VanEngelsdorp D, et al. Recent spread of Varroa destructor virus-1, a honey bee pathogen, in the United States. *Scientific Reports*. 2017;7(1). doi: 10.1038/s41598-017-17802-3.
  
21. Dietemann V, Pflugfelder J, Anderson D, Charrière JD, Chejanovsky N, Dainat B, et al. Varroa destructor: Research avenues towards sustainable control. *Journal of Apicultural Research*. 2012;51(1):125-32.
  
22. Ramsey SD, Ochoa R, Bauchan G, Gulbranson C, Mowery JD, Cohen A, et al. Varroa destructor feeds primarily on honey bee fat body tissue and not hemolymph. *Proceedings of the National Academy of Sciences of the United States of America*. 2019;116(5):1792-801. doi: 10.1073/pnas.1818371116.
  
23. Grozinger CM, Flenniken ML. Bee viruses: Ecology, pathogenicity, and impacts. *Annual Review of Entomology* 2019. p. 205-26.

## Supporting information

**S1 Figure.** Mite survival analysis of the virus acquisition and transmission experiment.

**S1 Table.** Primers and the synthetic gene used in this study.

**S2 Table.** Mite survival.

**S3 Table.** Mite excreta data.

**S4 Table.** Virus acquisition and transmission experiment: Mite survival summary.

**S5 Table.** Virus acquisition and transmission experiment: Mite survival analysis.

**S6 Table.** Virus acquisition and transmission experiment, RT-qPCR quantification of VDV1, DWV and honey bee actin.

**S1 Text.** Design of the infectious cDNA clone of Varroa destructor virus-1 (VDV1) and production of the clone-derived VDV1 inoculum.

**S2 Text.** Nucleotide sequence of the Varroa destructor virus-1 infectious cDNA construct (GenBank accession number MN249174).

**S1 Video.** Varroa feeding on artificial diet artificial supplemented with the particles of honey bee viruses.

## Supporting information

**S1 Figure.** Mite survival analysis of the virus acquisition and transmission experiment.

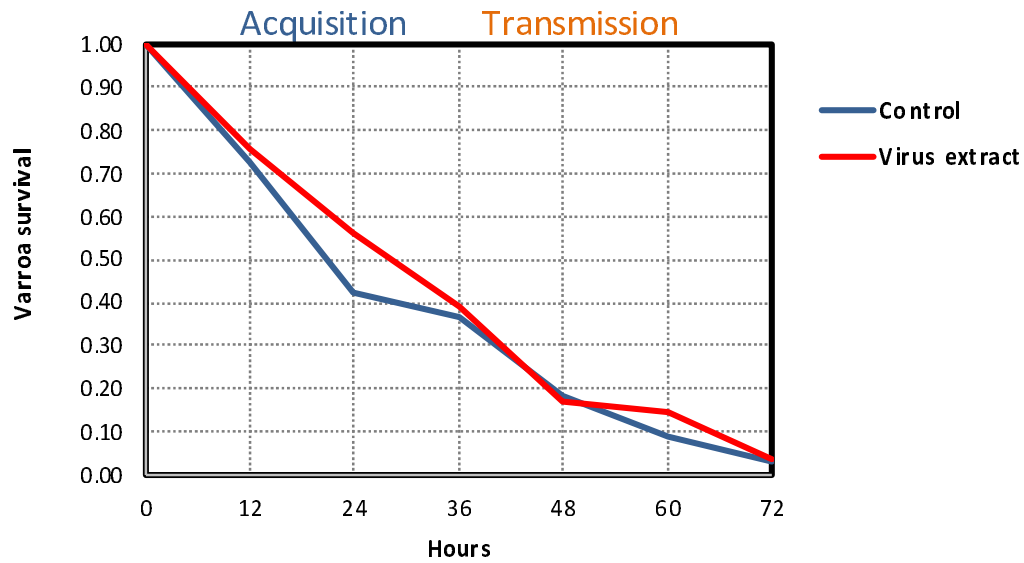

Wilcoxon test: P=0.5518 (non-significant), Chi Square = 0.3541, DF = 1.



**S1 Table. Primers and the synthetic gene used in this study (VDV1 genomic RNA - GenBank Accession MN249174, DWV genomic RNA - GenBank Accession number MG831200)**

| Primer ID            | Nucleotide sequence (5'-3')                                                                                                                                                                                                                                                                                                                                                                                           | Application, notes                                                                                                                                                                                                                                                                                                        |
|----------------------|-----------------------------------------------------------------------------------------------------------------------------------------------------------------------------------------------------------------------------------------------------------------------------------------------------------------------------------------------------------------------------------------------------------------------|---------------------------------------------------------------------------------------------------------------------------------------------------------------------------------------------------------------------------------------------------------------------------------------------------------------------------|
| T7-Ribozyme-5'-DWV   | GCGGCCGCGCGCGCGCGCTATAATCGACTCACTATAG<br><b>GG</b> attttaaactgatgagccgaaaggccgaaacccggatccgggttcT<br>TTAAATTCGCTATGGGAGGCGATTTATGCCTCCATAGC<br>GAATTACGGTGCAACTAACAATTTTAGTAGTAGCCATG<br>AACAAACATTATGATTACTCACTACGTATTGATCATTTTTA<br>CAATGACTTGCGTAGCATGAAGCGCATGCTTGTAGTTAT<br>AACTATGTTATTTGCAAGTTGGAGATAATTGATTGGAT<br>TATGGATGCGTGCACTAAGTGTCTACATCTATAGTCGTTT<br>GTGGTTCAAGTTTTGTGTTAGTAGTACAATTTGAGCGA<br>TCGC | Synthetic gene sequence used for construction of the full-length VDV1 cDNA clone. The T7 RNA polymerase promoter sequence (bold), 5'-ribozyme sequence (low case), positions 1 - 276 nt of VDV-1 genomic RNA. The 5'-terminal NotI and the 3'-terminal AsiSI restriction sites are underscored. GeneBank Accession number |
| VDV1-NotI-FseAsiSI-F | CGGAAGCGGCCGCGCGGCCCGCGATCGCATCGTATCGT<br>ATGAATGATATTTGAATGACAACACTG                                                                                                                                                                                                                                                                                                                                                 | RT-PCR amplification of the 6.3 kbp cDNA fragments corresponding to the 5' part of VDV1 cDNA fragment. Forward primer corresponding to the positions 277-319 of the VDV-1 genomic RNA, NotI and AsiSI restriction sites are underscored.                                                                                  |
| Pr-VDV1-6300R        | CTGAAGTACTAATCTCTGAG                                                                                                                                                                                                                                                                                                                                                                                                  | RT-PCR amplification of the 6.3 kbp cDNA fragments corresponding to the 5' part of VDV1 cDNA fragment. Sequence complementary to positions 6333 - 6352 of VDV-1 genomic RNA.                                                                                                                                              |
| VDV1-AsiSI-PmeI-A27R | CGGTATGGCGCGCGCGTTTAAACTTTTTTTTTTTTTTTTTT<br>TTTTTTTACTATTATGTTAAACTATACTAAATAGG                                                                                                                                                                                                                                                                                                                                      | RT-PCR amplification of the 5.2 kbp cDNA fragments corresponding to the 5' part of VDV1 cDNA fragment. Reverse primer complementary to the 3'-terminus of the VDV-1 genomic RNA, positions 10117 - 10148, with 27 nt poly(A), PmeI restriction sites are underscored.                                                     |
| Pr-VDV1-4800F        | CTGTAGTTAAGCGGTTATTAGAA                                                                                                                                                                                                                                                                                                                                                                                               | RT-PCR amplification of the 5.2 kbp cDNA fragments corresponding to the 5' part of VDV1 cDNA fragment. Sequence corresponding to positions 4925 - 4947 of VDV-1 genomic RNA.                                                                                                                                              |
| Amel-qbACT-F         | AGGAATGGAAGCTTGCGGTA                                                                                                                                                                                                                                                                                                                                                                                                  | RT-qPCR quantification of Apis mellifera actin mRNA, GenBank Accession NM_001185145, positions 937-956.                                                                                                                                                                                                                   |
| Amel-qbACT-R         | AATTTTCATGGTGGATGGTGC                                                                                                                                                                                                                                                                                                                                                                                                 | RT-qPCR quantification of Apis mellifera actin mRNA, GenBank Accession NM_001185145, complementary to positions 1117-1097.                                                                                                                                                                                                |
| VDV-For              | CTGTAGTTAAGCGGTTATTAGAA                                                                                                                                                                                                                                                                                                                                                                                               | RT-qPCR quantification of VDV1. Positions 4925-4947 of VDV1 genomic                                                                                                                                                                                                                                                       |
| VDV-Rev              | GGTGCTTCTGGAATAGCGGAA                                                                                                                                                                                                                                                                                                                                                                                                 | RT-qPCR quantification of VDV1. Complementary to positions 5001 to 5021                                                                                                                                                                                                                                                   |
| DWV-For              | GAGATTGAAGCGCATGAACA                                                                                                                                                                                                                                                                                                                                                                                                  | RT-qPCR quantification of DWV. DWV genomic RNA, positions 6497-6516                                                                                                                                                                                                                                                       |
| DWV-Rev              | TGAATTCAGTGTCGCCATA                                                                                                                                                                                                                                                                                                                                                                                                   | RT-qPCR quantification of DWV. DWV genomic RNA, complementary to positions 6626-6607.                                                                                                                                                                                                                                     |
| 02-DWV20F            | GCCTTCATAGCGAATTACG                                                                                                                                                                                                                                                                                                                                                                                                   | RT-PCR amplification of the VDV1 and DWV IRES sequence, positions 30-49 of VDV1 genomic RNA.                                                                                                                                                                                                                              |
| 05-DWV1240Rev        | CGCCGCCTAGCTTCATCA                                                                                                                                                                                                                                                                                                                                                                                                    | RT-PCR amplification of the VDV1 and DWV IRES sequence, complementary to positions 1236-1252 of VDV1 genomic RNA.                                                                                                                                                                                                         |

S2 Table. Mite survival.

| Treatment               | Evaluation | Survival   | Survival Std Err | Survival Lower | Survival Upper | Survival Simultaneous Lower | Survival Simultaneous Upper | Failure Lower | Failure Upper | Failure Lower | Failure Upper | Failure Simultaneous Lower | Failure Simultaneous Upper | Number failed | Number censored | At Risk |
|-------------------------|------------|------------|------------------|----------------|----------------|-----------------------------|-----------------------------|---------------|---------------|---------------|---------------|----------------------------|----------------------------|---------------|-----------------|---------|
| Pupae                   | 0          | 1          | 0                |                |                |                             |                             | 0             |               |               |               |                            |                            | 0             | 0               | 24      |
| Pupae                   | 1          | 0.95833333 | 0.04078938       | 0.75646132     | 0.99416259     | 0.476888822                 | 0.99827957                  | 0.04166667    | 0.0583741     | 0.24353868    | 0.00172043    | 0.52310118                 | 1                          | 0             | 23              | 24      |
| Pupae                   | 2          | 0.91666667 | 0.05641693       | 0.72118877     | 0.9790701      | 0.516014671                 | 0.99126571                  | 0.08333333    | 0.0209299     | 0.27881123    | 0.00873443    | 0.48398533                 | 1                          | 0             | 22              | 23      |
| Pupae                   | 5          | 0.79366667 | 0.08289817       | 0.58658721     | 0.91053032     | 0.437013158                 | 0.94898605                  | 0.20833333    | 0.0846968     | 0.41341279    | 0.05101394    | 0.56298684                 | 3                          | 0             | 21              | 22      |
| Pupae                   | 6          | 0.70833333 | 0.09278048       | 0.50177637     | 0.85414661     | 0.370093169                 | 0.90940763                  | 0.29166667    | 0.14585339    | 0.49822363    | 0.09059236    | 0.62990683                 | 2                          | 0             | 20              | 21      |
| Pupae                   | 7          | 0.66666667 | 0.09622504       | 0.46119268     | 0.82373154     | 0.337339499                 | 0.887101209                 | 0.33333333    | 0.17626846    | 0.53880732    | 0.11289879    | 0.6626605                  | 1                          | 0             | 19              | 20      |
| Pupae                   | 8          | 0.58333333 | 0.10063456       | 0.38342642     | 0.75914074     | 0.274503534                 | 0.838191972                 | 0.41666667    | 0.24085926    | 0.61657358    | 0.16180803    | 0.72549647                 | 2                          | 0             | 18              | 19      |
| Pupae                   | 10         | 0.5        | 0.10206207       | 0.30999302     | 0.69000698     | 0.215841877                 | 0.784158123                 | 0.5           | 0.30999302    | 0.69000698    | 0.21584188    | 0.78415812                 | 2                          | 0             | 16              | 18      |
| Pupae                   | 11         | 0.36666667 | 0.07607258       | 0.0639867      | 0.36913687     | 0.034216186                 | 0.530304154                 | 0.83333333    | 0.63086313    | 0.9360133     | 0.46969585    | 0.96578381                 | 8                          | 0             | 12              | 16      |
| Pupae                   | 13         | 0.125      | 0.06750772       | 0.04087016     | 0.32383695     | 0.019912298                 | 0.501121049                 | 0.875         | 0.67616305    | 0.95912984    | 0.49887895    | 0.9800877                  | 1                          | 0             | 11              | 15      |
| Pupae                   | 16         | 0.08333333 | 0.05641693       | 0.0209299      | 0.27881123     | 0.008734429                 | 0.483985329                 | 0.91666667    | 0.72118877    | 0.9790701     | 0.51601467    | 0.99126571                 | 1                          | 0             | 10              | 14      |
| Pupae                   | 18         | 0.04366667 | 0.04078938       | 0.0583741      | 0.24353868     | 0.00172043                  | 0.523101178                 | 0.95833333    | 0.75646132    | 0.99416259    | 0.47688882    | 0.99827957                 | 1                          | 0             | 9               | 13      |
| Pupae                   | 24         | 0.04366667 | 0.04078938       | 0.0583741      | 0.24353868     | 0.00172043                  | 0.523101178                 | 0.95833333    | 0.75646132    | 0.99416259    | 0.47688882    | 0.99827957                 | 0                          | 1             | 8               | 12      |
| Feeding Device - Water  | 0          | 1          | 0                |                |                |                             |                             | 0             |               |               |               |                            |                            | 0             | 0               | 32      |
| Feeding Device - Water  | 1          | 0.0625     | 0.04279082       | 0.01568246     | 0.21811335     | 0.006588705                 | 0.401237263                 | 0.9375        | 0.78188665    | 0.98431754    | 0.59876274    | 0.99341129                 | 30                         | 0             | 32              | 32      |
| Feeding Device - Water  | 2          | 0          | 0                |                |                |                             |                             | 1             |               |               |               | 2                          | 0                          | 2             | 0               | 30      |
| Feeding Device - Diet 1 | 0          | 1          | 0                |                |                |                             |                             | 0             |               |               |               | 0                          | 0                          | 3             | 0               | 30      |
| Feeding Device - Diet 1 | 1          | 0.6        | 0.08944272       | 0.41946492     | 0.75692618     | 0.316003965                 | 0.829647003                 | 0.4           | 0.24307382    | 0.58053508    | 0.170353      | 0.68399604                 | 12                         | 0             | 30              | 30      |
| Feeding Device - Diet 1 | 2          | 0.1        | 0.05477226       | 0.0326088      | 0.26807162     | 0.015979512                 | 0.43189842                  | 0.9           | 0.73192838    | 0.9673912     | 0.56810158    | 0.98402049                 | 15                         | 0             | 18              | 28      |
| Feeding Device - Diet 1 | 3          | 0          | 0                |                |                |                             |                             | 1             |               |               |               | 3                          | 0                          | 3             | 0               | 15      |
| Feeding Device - Diet 2 | 0          | 1          | 0                |                |                |                             |                             | 0             |               |               |               | 0                          | 0                          | 3             | 0               | 32      |
| Feeding Device - Diet 2 | 1          | 0.82352941 | 0.0653787        | 0.65897292     | 0.91850229     | 0.529680836                 | 0.950828849                 | 0.17647059    | 0.08149771    | 0.34102708    | 0.04917115    | 0.47031916                 | 6                          | 0             | 30              | 32      |
| Feeding Device - Diet 2 | 2          | 0.47058824 | 0.08560081       | 0.31190865     | 0.63544432     | 0.230847102                 | 0.724734314                 | 0.52941176    | 0.36455568    | 0.68809135    | 0.27528569    | 0.7691529                  | 12                         | 0             | 24              | 30      |
| Feeding Device - Diet 2 | 3          | 0.05882353 | 0.04035261       | 0.01475736     | 0.20684782     | 0.006207225                 | 0.384767089                 | 0.94117647    | 0.79315218    | 0.98524264    | 0.61523291    | 0.99379277                 | 14                         | 0             | 12              | 24      |
| Feeding Device - Diet 3 | 4          | 0          | 0                |                |                |                             |                             | 1             |               |               |               | 2                          | 0                          | 2             | 0               | 10      |
| Feeding Device - Diet 3 | 0          | 1          | 0                |                |                |                             |                             | 0             |               |               |               | 0                          | 0                          | 3             | 0               | 42      |
| Feeding Device - Diet 3 | 1          | 0.47619048 | 0.07706415       | 0.33162266     | 0.62486151     | 0.255096096                 | 0.707028272                 | 0.52380952    | 0.37513849    | 0.66837734    | 0.29297173    | 0.7449039                  | 22                         | 0             | 42              | 42      |
| Feeding Device - Diet 3 | 2          | 0.38095238 | 0.07493293       | 0.24819253     | 0.53426119     | 0.183984732                 | 0.626812075                 | 0.61904762    | 0.46573881    | 0.75180747    | 0.37318793    | 0.81601527                 | 4                          | 0             | 20              | 42      |
| Feeding Device - Diet 3 | 3          | 0.18047619 | 0.06059133       | 0.09822609     | 0.33698795     | 0.063646468                 | 0.448882051                 | 0.80952381    | 0.66301205    | 0.90177391    | 0.55111795    | 0.93635353                 | 8                          | 0             | 16              | 20      |
| Feeding Device - Diet 3 | 4          | 0.02380952 | 0.02352437       | 0.00334381     | 0.15060676     | 0.000994896                 | 0.373959482                 | 0.97619048    | 0.84939324    | 0.99665619    | 0.62604052    | 0.9990051                  | 7                          | 0             | 8               | 16      |
| Feeding Device - Diet 3 | 5          | 0          | 0                |                |                |                             |                             | 1             |               |               |               | 1                          | 0                          | 1             | 0               | 7       |
| Combined                | 0          | 1          | 0                |                |                |                             |                             | 0             |               |               |               | 0                          | 0                          | 0             | 0               | 162     |
| Combined                | 1          | 0.5617284  | 0.03898319       | 0.4844617      | 0.63611291     | 0.437283468                 | 0.678863457                 | 0.4382716     | 0.36888709    | 0.51553383    | 0.32113654    | 0.56271653                 | 71                         | 0             | 162             | 162     |
| Combined                | 2          | 0.35185185 | 0.03751972       | 0.28224205     | 0.42838318     | 0.244013432                 | 0.477261239                 | 0.64814815    | 0.57161682    | 0.71775795    | 0.52273876    | 0.75598657                 | 34                         | 0             | 128             | 162     |
| Combined                | 3          | 0.18753086 | 0.03128053       | 0.14324764     | 0.26599798     | 0.116563132                 | 0.314705736                 | 0.80246914    | 0.73400202    | 0.85675236    | 0.68529426    | 0.88343687                 | 25                         | 0             | 94              | 162     |
| Combined                | 4          | 0.14197531 | 0.02742198       | 0.09620002     | 0.20460119     | 0.075138339                 | 0.252061773                 | 0.85802469    | 0.79539881    | 0.90379988    | 0.74793823    | 0.92486166                 | 9                          | 0             | 69              | 162     |
| Combined                | 5          | 0.11728395 | 0.02527972       | 0.07606928     | 0.17656162     | 0.057865916                 | 0.223255192                 | 0.88271605    | 0.82343838    | 0.92393072    | 0.77674409    | 0.94213408                 | 4                          | 0             | 65              | 162     |
| Combined                | 6          | 0.10493827 | 0.02407886       | 0.0662375      | 0.16232014     | 0.0495659                   | 0.208593383                 | 0.89506173    | 0.83767986    | 0.9337625     | 0.79140662    | 0.9504341                  | 2                          | 0             | 61              | 162     |
| Combined                | 7          | 0.08876543 | 0.02344034       | 0.06138961     | 0.15513568     | 0.045512807                 | 0.20111929                  | 0.90123457    | 0.84486432    | 0.93861039    | 0.7388071     | 0.95448719                 | 1                          | 0             | 59              | 162     |
| Combined                | 8          | 0.08641975 | 0.0210761        | 0.05184827     | 0.140624       | 0.037624736                 | 0.186249424                 | 0.91358025    | 0.859376      | 0.94815173    | 0.81375058    | 0.96237526                 | 2                          | 0             | 57              | 162     |
| Combined                | 10         | 0.07407407 | 0.02057613       | 0.04254484     | 0.12589641     | 0.030069045                 | 0.171117402                 | 0.92592593    | 0.8710359     | 0.95745506    | 0.8288626     | 0.96993095                 | 2                          | 0             | 55              | 162     |
| Combined                | 11         | 0.02469136 | 0.01219231       | 0.00929804     | 0.06392462     | 0.005085944                 | 0.111408324                 | 0.97530864    | 0.93607538    | 0.99070196    | 0.8885068     | 0.99491406                 | 8                          | 0             | 47              | 162     |
| Combined                | 13         | 0.01851852 | 0.01059221       | 0.00598496     | 0.05582547     | 0.002982966                 | 0.106335245                 | 0.98148148    | 0.9417453     | 0.99401504    | 0.89366476    | 0.99701703                 | 1                          | 0             | 39              | 162     |
| Combined                | 16         | 0.01234568 | 0.00867566       | 0.00308977     | 0.04799434     | 0.001317888                 | 0.105889246                 | 0.98765432    | 0.95200566    | 0.99691023    | 0.89413075    | 0.99868211                 | 1                          | 0             | 38              | 162     |
| Combined                | 18         | 0.00617284 | 0.00615376       | 0.00086887     | 0.04247798     | 0.000260876                 | 0.128800546                 | 0.99382716    | 0.95752202    | 0.99913113    | 0.87119945    | 0.99973912                 | 1                          | 0             | 37              | 162     |
| Combined                | 24         | 0.00617284 | 0.00615376       | 0.00086887     | 0.04247798     | 0.000260876                 | 0.128800546                 | 0.99382716    | 0.95752202    | 0.99913113    | 0.87119945    | 0.99973912                 | 0                          | 1             | 36              | 162     |

S3 Table. Mite excreta data.

| Evaluation (Day) | Diet chamber number | Varroa number | Excreta count Evaluation | Feces per day Evaluation | Alive on the day of observation | Dead mites in chamber |
|------------------|---------------------|---------------|--------------------------|--------------------------|---------------------------------|-----------------------|
| 1                | 1                   | 2             | 9                        | 9                        | 1                               | 1                     |
| 1                | 2                   | 2             | 6                        | 6                        | 1                               | 1                     |
| 1                | 3                   | 2             | 1                        | 1                        | 2                               | 0                     |
| 1                | 4                   | 2             | 0                        | 0                        | 0                               | 2                     |
| 1                | 5                   | 0             | 0                        | 0                        | 0                               | 0                     |
| 1                | 6                   | 0             | 0                        | 0                        | 0                               | 0                     |
| 1                | 7                   | 3             | 16                       | 16                       | 2                               | 1                     |
| 1                | 8                   | 3             | 0                        | 0                        | 2                               | 1                     |
| 1                | 9                   | 4             | 11                       | 11                       | 1                               | 3                     |
| 1                | 10                  | 4             | 16                       | 16                       | 3                               | 1                     |
| 1                | 11                  | 4             | 1                        | 1                        | 1                               | 3                     |
| 1                | 12                  | 4             | 0                        | 0                        | 0                               | 4                     |
| 1                | 13                  | 4             | 31                       | 31                       | 3                               | 1                     |
| 1                | 14                  | 4             | 54                       | 54                       | 4                               | 0                     |
| 1                | 15                  | 4             | 0                        | 0                        | 0                               | 4                     |
| 2                | 1                   | 2             | 12                       | 3                        | 1                               | 1                     |
| 2                | 2                   | 2             | 6                        | 0                        | 1                               | 1                     |
| 2                | 3                   | 2             | 17                       | 16                       | 2                               | 0                     |
| 2                | 4                   | 2             | 0                        | 0                        | 0                               | 2                     |
| 2                | 5                   | 0             | 0                        | 0                        | 0                               | 0                     |
| 2                | 6                   | 0             | 0                        | 0                        | 0                               | 0                     |
| 2                | 7                   | 3             | 27                       | 11                       | 2                               | 1                     |
| 2                | 8                   | 3             | 0                        | 0                        | 1                               | 2                     |
| 2                | 9                   | 4             | 14                       | 3                        | 1                               | 3                     |
| 2                | 10                  | 4             | 18                       | 2                        | 3                               | 1                     |
| 2                | 11                  | 4             | 1                        | 0                        | 0                               | 4                     |
| 2                | 12                  | 4             | 0                        | 0                        | 0                               | 4                     |
| 2                | 13                  | 4             | 48                       | 17                       | 3                               | 1                     |
| 2                | 14                  | 4             | 80                       | 26                       | 2                               | 2                     |
| 2                | 15                  | 4             | 0                        | 0                        | 0                               | 4                     |
| 3                | 1                   | 2             | 12                       | 0                        | 1                               | 1                     |
| 3                | 2                   | 2             | 6                        | 0                        | 0                               | 2                     |
| 3                | 3                   | 2             | 20                       | 3                        | 0                               | 2                     |
| 3                | 4                   | 2             | 0                        | 0                        | 0                               | 2                     |
| 3                | 5                   | 1             | 0                        | 0                        | 0                               | 1                     |
| 3                | 6                   | 0             | 0                        | 0                        | 0                               | 0                     |
| 3                | 7                   | 3             | 27                       | 0                        | 1                               | 2                     |
| 3                | 8                   | 3             | 1                        | 1                        | 0                               | 2                     |
| 3                | 9                   | 4             | 14                       | 0                        | 0                               | 4                     |
| 3                | 10                  | 4             | 35                       | 17                       | 3                               | 1                     |
| 3                | 11                  | 4             | 1                        | 0                        | 0                               | 4                     |
| 3                | 12                  | 4             | 0                        | 0                        | 0                               | 4                     |
| 3                | 13                  | 4             | 52                       | 4                        | 3                               | 1                     |
| 3                | 14                  | 4             | 80                       | 0                        | 0                               | 4                     |
| 3                | 15                  | 4             | 0                        | 0                        | 0                               | 4                     |
| 4                | 1                   | 2             | 15                       | 3                        | 0                               | 2                     |
| 4                | 2                   | 2             | 6                        | 0                        | 0                               | 2                     |
| 4                | 3                   | 2             | 20                       | 0                        | 0                               | 2                     |
| 4                | 4                   | 2             | 0                        | 0                        | 0                               | 2                     |
| 4                | 5                   | 1             | 0                        | 0                        | 0                               | 1                     |
| 4                | 6                   | 0             | 0                        | 0                        | 0                               | 0                     |
| 4                | 7                   | 3             | 30                       | 3                        | 0                               | 3                     |
| 4                | 8                   | 3             | 1                        | 0                        | 0                               | 3                     |
| 4                | 9                   | 4             | 14                       | 0                        | 0                               | 4                     |
| 4                | 10                  | 4             | 35                       | 0                        | 1                               | 3                     |
| 4                | 11                  | 4             | 1                        | 0                        | 0                               | 4                     |
| 4                | 12                  | 4             | 0                        | 0                        | 0                               | 4                     |
| 4                | 13                  | 4             | 60                       | 8                        | 0                               | 4                     |
| 4                | 14                  | 4             | 80                       | 0                        | 0                               | 4                     |
| 4                | 15                  | 4             | 0                        | 0                        | 0                               | 4                     |
| 5                | 1                   | 2             | 15                       | 0                        | 0                               | 2                     |
| 5                | 2                   | 2             | 6                        | 0                        | 0                               | 3                     |
| 5                | 3                   | 2             | 20                       | 0                        | 0                               | 2                     |
| 5                | 4                   | 2             | 0                        | 0                        | 0                               | 2                     |
| 5                | 5                   | 1             | 0                        | 0                        | 0                               | 1                     |
| 5                | 6                   | 0             | 0                        | 0                        | 0                               | 0                     |
| 5                | 7                   | 3             | 30                       | 0                        | 0                               | 3                     |
| 5                | 8                   | 3             | 1                        | 0                        | 0                               | 3                     |
| 5                | 9                   | 4             | 14                       | 0                        | 0                               | 4                     |
| 5                | 10                  | 4             | 35                       | 0                        | 0                               | 2                     |
| 5                | 11                  | 4             | 1                        | 0                        | 0                               | 4                     |
| 5                | 12                  | 4             | 0                        | 0                        | 0                               | 4                     |
| 5                | 13                  | 4             | 60                       | 0                        | 0                               | 4                     |
| 5                | 14                  | 4             | 80                       | 0                        | 0                               | 4                     |
| 5                | 15                  | 4             | 0                        | 0                        | 0                               | 4                     |

**54 Table.** Virus acquisition and transmission experiment: Mite survival summary.

| Treatment     | Device samples | Varroa mites per device | Total varroa | Acquisition - Diet   |                      |                 |                         | Transmission - Pupae |                      |                      |                   |                       |                       |                      |                      |                   |                         |
|---------------|----------------|-------------------------|--------------|----------------------|----------------------|-----------------|-------------------------|----------------------|----------------------|----------------------|-------------------|-----------------------|-----------------------|----------------------|----------------------|-------------------|-------------------------|
|               |                |                         |              | 30 hours             |                      |                 |                         | First day ≥ 24 hours |                      |                      |                   |                       | Second day ≥ 48 hours |                      |                      |                   |                         |
|               |                |                         |              | Number of live mites | Number of dead mites | Number of feces | Mean excreta per device | Number of live mites | Number of dead mites | Devises with excreta | Number of excreta | Mean feces per device | Number of live mites  | Number of dead mites | Devises with excreta | Number of excreta | Mean excreta per device |
| Control (PBS) | 10             | 4                       | 40           | 15                   | 14                   | 23              | 4.6                     | 5                    | 9                    | 4                    | 15                | 3.8                   | 1                     | 8                    | 3                    | 38                | 12.7                    |
| Virus extract | 10             | 4                       | 40           | 23                   | 18                   | 82              | 9.1                     | 7                    | 11                   | 6                    | 26                | 4.3                   | 3                     | 8                    | 7                    | 41                | 5.9                     |

**S5 Table. Virus acquisition and transmission experiment: Mite survival analysis.**

| Treatment     | Hours | Survival | SurvStdErr |
|---------------|-------|----------|------------|
| Control       | 0     | 1.00     | 0.00       |
| Control       | 12    | 0.73     | 0.08       |
| Control       | 24    | 0.42     | 0.09       |
| Control       | 36    | 0.36     | 0.08       |
| Control       | 48    | 0.18     | 0.07       |
| Control       | 60    | 0.09     | 0.05       |
| Control       | 72    | 0.03     | 0.03       |
| Virus extract | 0     | 1.00     | 0.00       |
| Virus extract | 12    | 0.76     | 0.07       |
| Virus extract | 24    | 0.56     | 0.08       |
| Virus extract | 36    | 0.39     | 0.08       |
| Virus extract | 48    | 0.17     | 0.06       |
| Virus extract | 60    | 0.15     | 0.06       |
| Virus extract | 72    | 0.04     | 0.03       |

| Summary       |               |                 |         |           |
|---------------|---------------|-----------------|---------|-----------|
| Group         | Number failed | Number censored | Mean    | Std Error |
| Control       | 32            | 1               | 33.4545 | 3.4955    |
| Virus extract | 38            | 3               | 36.2927 | 3.18047   |
| Combined      | 70            | 4               | 35.027  | 2.3415    |

| Quantiles     |             |           |           |              |              |
|---------------|-------------|-----------|-----------|--------------|--------------|
| Group         | Median Time | Lower 95% | Upper 95% | 25% Failures | 75% Failures |
| Control       | 24          | 24        | 48        | 12           | 48           |
| Virus extract | 36          | 24        | 48        | 24           | 48           |
| Combined      | 30          | 24        | 36        | 12           | 48           |

| Tests between groups |           |    |            |
|----------------------|-----------|----|------------|
| Test                 | ChiSquare | DF | Prob>ChiSq |
| Log-Rank             | 0.3071    | 1  | 0.5795     |
| Wilcoxon             | 0.3541    | 1  | 0.5518     |

S6 Table. Virus acquisition and transmission experiment, RT-qPCR quantification of VDV1, DWV and honeybee actin.

| Treatment           | Pupa ID | qPCR probes    | Ct (undetectable Ct=50) |
|---------------------|---------|----------------|-------------------------|
| Buffer control PBS  | 1       | Honeybee actin | 23.05540541             |
| Buffer control PBS  | 2       | Honeybee actin | 22.5438735              |
| Buffer control PBS  | 3       | Honeybee actin | 22.28138805             |
| Buffer control PBS  | 4       | Honeybee actin | 24.05986698             |
| Buffer control PBS  | 5       | Honeybee actin | 22.47194865             |
| Buffer control PBS  | 6       | Honeybee actin | 23.17104396             |
| Buffer control PBS  | 7       | Honeybee actin | 22.60577                |
| Buffer control PBS  | 8       | Honeybee actin | 22.13795216             |
| Buffer control PBS  | 9       | Honeybee actin | 22.7627873              |
| VDV1 clonal extract | 26      | Honeybee actin | 21.66346436             |
| VDV1 clonal extract | 27      | Honeybee actin | 20.75536784             |
| VDV1 clonal extract | 28      | Honeybee actin | 20.68889974             |
| VDV1 clonal extract | 29      | Honeybee actin | 23.24768149             |
| VDV1 clonal extract | 30      | Honeybee actin | 21.35983192             |
| VDV1 clonal extract | 31      | Honeybee actin | 22.90984082             |
| VDV1 clonal extract | 32      | Honeybee actin | 22.74880682             |
| VDV1 clonal extract | 33      | Honeybee actin | 21.29350752             |
| VDV1 clonal extract | 34      | Honeybee actin | 22.30177954             |
| VDV1 clonal extract | 35      | Honeybee actin | 21.85226257             |
| VDV1 clonal extract | 36      | Honeybee actin | 23.21928097             |
| VDV1 clonal extract | 37      | Honeybee actin | 20.32743693             |
| VDV1 clonal extract | 38      | Honeybee actin | 22.41888221             |
| VDV1 clonal extract | 39      | Honeybee actin | 23.207172723            |
| VDV1 clonal extract | 40      | Honeybee actin | 24.28932346             |
| Water control       | n/a     |                | 50                      |

  

| Treatment                | Pupa ID | qPCR probes | Ct (undetectable Ct=50) | log10 (virus genome equivalents per reaction) | log10 (virus genome equivalents per pupa) * | virus genome equivalents per pupa * |
|--------------------------|---------|-------------|-------------------------|-----------------------------------------------|---------------------------------------------|-------------------------------------|
| Buffer control PBS       | 1       | VDV1        | 50                      | -1.965                                        | 4                                           | 10000                               |
| Buffer control PBS       | 2       | VDV1        | 36.29948851             | 1.414916183                                   | 4.892037438                                 | 77990                               |
| Buffer control PBS       | 3       | VDV1        | 38.23171474             | 0.938235973                                   | 4.415357228                                 | 26023                               |
| Buffer control PBS       | 4       | VDV1        | 50                      | -1.965                                        | 4                                           | 10000                               |
| Buffer control PBS       | 5       | VDV1        | 39.03937569             | 0.73898036                                    | 4.236107271                                 | 16448                               |
| Buffer control PBS       | 6       | VDV1        | 50                      | -1.965                                        | 4                                           | 10000                               |
| Buffer control PBS       | 7       | VDV1        | 38.61979425             | 0.842496759                                   | 4.339618014                                 | 20875                               |
| Buffer control PBS       | 8       | VDV1        | 38.0270881              | 0.988717367                                   | 4.465838622                                 | 29231                               |
| Buffer control PBS       | 9       | VDV1        | 38.08137512             | 0.975324758                                   | 4.452446013                                 | 28343                               |
| VDV1 clonal extract      | 26      | VDV1        | 32.40787937             | 7.442465731                                   | 10.91958699                                 | 83097333889                         |
| VDV1 clonal extract      | 27      | VDV1        | 32.04321422             | 7.53476248                                    | 11.01188373                                 | 1.02774E+11                         |
| VDV1 clonal extract      | 28      | VDV1        | 31.53002467             | 7.664650756                                   | 11.34177201                                 | 1.38603E+11                         |
| VDV1 clonal extract      | 29      | VDV1        | 34.19766579             | 1.927470788                                   | 5.404592042                                 | 253858.6945                         |
| VDV1 clonal extract      | 30      | VDV1        | 34.16820191             | 1.934928096                                   | 5.412049351                                 | 258255.364                          |
| VDV1 clonal extract      | 31      | VDV1        | 32.45278334             | 7.420975538                                   | 10.89809779                                 | 79085668965                         |
| VDV1 clonal extract      | 32      | VDV1        | 33.84559862             | 7.20512899                                    | 10.68225024                                 | 48111649239                         |
| VDV1 clonal extract      | 33      | VDV1        | 34.38485528             | 6.992773128                                   | 10.46983438                                 | 29500840932                         |
| VDV1 clonal extract      | 34      | VDV1        | 27.53938796             | 3.612680908                                   | 7.089802163                                 | 12297084.66                         |
| VDV1 clonal extract      | 35      | VDV1        | 36.90206763             | 1.242986683                                   | 4.720170937                                 | 52493.79095                         |
| VDV1 clonal extract      | 36      | VDV1        | 37.9244078              | 6.046232386                                   | 9.523353641                                 | 3336980286                          |
| VDV1 clonal extract      | 37      | VDV1        | 28.64652948             | 3.332463388                                   | 6.809584643                                 | 6450370.234                         |
| VDV1 clonal extract      | 38      | VDV1        | 30.04292524             | 2.977423374                                   | 6.454544629                                 | 2848030.455                         |
| VDV1 clonal extract      | 39      | VDV1        | 34.05604534             | 1.963314924                                   | 5.440436178                                 | 275699.6269                         |
| VDV1 clonal extract      | 40      | VDV1        | 36.1612757              | 1.430481221                                   | 4.507602376                                 | 80835.54599                         |
| VDV1 cDNA standard, 2E+8 | VDV1    |             | 4.190697624             | 9.301029996                                   |                                             |                                     |
| VDV1 cDNA standard, 2E+7 | VDV1    |             | 8.527215644             | 8.301029996                                   |                                             |                                     |
| VDV1 cDNA standard, 2E+6 | VDV1    |             | 12.52613919             | 7.301029996                                   |                                             |                                     |
| VDV1 cDNA standard, 2E+5 | VDV1    |             | 17.34929045             | 6.301029996                                   |                                             |                                     |
| VDV1 cDNA standard, 2E+4 | VDV1    |             | 19.7312901              | 5.301029996                                   |                                             |                                     |
| VDV1 cDNA standard, 2E+3 | VDV1    |             | 24.74276437             | 4.301029996                                   |                                             |                                     |
| Water control            | VDV1    |             | 50                      |                                               |                                             |                                     |
| Water control            | VDV1    |             | 50                      |                                               |                                             |                                     |
| Water control            | VDV1    |             | 50                      |                                               |                                             |                                     |

  

| Treatment               | Pupa ID | qPCR probes | Ct (undetectable Ct=50) | log10 (virus genome equivalents per reaction) | log10 (virus genome equivalents per pupa) * | virus genome equivalents per pupa * |
|-------------------------|---------|-------------|-------------------------|-----------------------------------------------|---------------------------------------------|-------------------------------------|
| Buffer control PBS      | 1       | DWV         | 50                      | 1.534                                         | 4                                           | 10000                               |
| Buffer control PBS      | 2       | DWV         | 50                      | 1.534                                         | 4                                           | 10000                               |
| Buffer control PBS      | 3       | DWV         | 50                      | 1.534                                         | 4                                           | 10000                               |
| Buffer control PBS      | 4       | DWV         | 39.72450691             | 3.356395912                                   | 6.833517166                                 | 6815805                             |
| Buffer control PBS      | 5       | DWV         | 36.88952508             | 3.864708152                                   | 7.341829407                                 | 21969967                            |
| Buffer control PBS      | 6       | DWV         | 50                      | 1.534                                         | 4                                           | 10000                               |
| Buffer control PBS      | 7       | DWV         | 50                      | 1.534                                         | 4                                           | 10000                               |
| Buffer control PBS      | 8       | DWV         | 50                      | 1.534                                         | 4                                           | 10000                               |
| Buffer control PBS      | 9       | DWV         | 37.70011095             | 3.719368493                                   | 7.196489748                                 | 35721347                            |
| VDV1 clonal extract     | 26      | DWV         | 34.9680825              | 4.789719993                                   | 8.266841248                                 | 184859276.1                         |
| VDV1 clonal extract     | 27      | DWV         | 32.48954161             | 7.99304032                                    | 11.47016157                                 | 2.85211E+11                         |
| VDV1 clonal extract     | 28      | DWV         | 34.59655098             | 4.842791486                                   | 8.31991274                                  | 208887638.6                         |
| VDV1 clonal extract     | 29      | DWV         | 39.04444516             | 4.20896565                                    | 7.686087819                                 | 48538664.09                         |
| VDV1 clonal extract     | 30      | DWV         | 37.9860319              | 4.359790454                                   | 7.836913709                                 | 68692877.47                         |
| VDV1 clonal extract     | 31      | DWV         | 50                      | 2.6478                                        | 4                                           | 10000                               |
| VDV1 clonal extract     | 32      | DWV         | 40.24756139             | 4.037522503                                   | 7.534643757                                 | 32707229.42                         |
| VDV1 clonal extract     | 33      | DWV         | 45.74444817             | 3.254216136                                   | 6.731337391                                 | 5386881.115                         |
| VDV1 clonal extract     | 34      | DWV         | 37.82658718             | 4.382511327                                   | 7.899632582                                 | 72382333.86                         |
| VDV1 clonal extract     | 35      | DWV         | 39.39455123             | 4.159071445                                   | 7.636197705                                 | 43271076.99                         |
| VDV1 clonal extract     | 36      | DWV         | 42.51564163             | 3.734121067                                   | 7.191442321                                 | 15519848.97                         |
| VDV1 clonal extract     | 37      | DWV         | 34.34479904             | 4.878666136                                   | 8.355787391                                 | 22687539.1                          |
| VDV1 clonal extract     | 38      | DWV         | 37.01411733             | 4.498288281                                   | 7.975409536                                 | 94495153.66                         |
| VDV1 clonal extract     | 39      | DWV         | 50                      | 2.6478                                        | 4                                           | 10000                               |
| VDV1 clonal extract     | 40      | DWV         | 39.46642793             | 4.148834039                                   | 7.625955274                                 | 42262508.79                         |
| DWV cDNA standard, 2E+8 | DWV     |             | 10.03542651             | 8.301029996                                   |                                             |                                     |
| DWV cDNA standard, 2E+7 | DWV     |             | 18.35676136             | 7.301029996                                   |                                             |                                     |
| DWV cDNA standard, 2E+6 | DWV     |             | 27.55658133             | 6.301029996                                   |                                             |                                     |
| DWV cDNA standard, 2E+5 | DWV     |             | 30.40417705             | 5.301029996                                   |                                             |                                     |
| DWV cDNA standard, 2E+4 | DWV     |             | 33.01657196             | 4.301029996                                   |                                             |                                     |
| DWV cDNA standard, 2E+3 | DWV     |             | 37.1520873              | 3.301029996                                   |                                             |                                     |
| Water control           | DWV     |             | 50                      |                                               |                                             |                                     |
| Water control           | DWV     |             | 50                      |                                               |                                             |                                     |
| Water control           | DWV     |             | 50                      |                                               |                                             |                                     |

\* For Ct values below detection level log10(DWV or VDV1)=4

## **S1 Text. Design of the infectious cDNA clone of Varroa destructor virus-1 (VDV1) and production of the clone-derived VDV1 inoculum**

The full-length cDNA clone of Varroa destructor virus (VDV1) GenBank Accession number MN249174, was generated using total RNA from the honey bees sourced in California in 2016, isolate CA-07-2016, which showed high VDV1 and low DWV levels [1], using approach described in [2]. Two overlapping VDV1 cDNA fragments corresponding to the 5' and 3' sections of genomic RNA were amplified by RT-PCR using Superscript III reverse transcriptase (Invitrogen) and proof-reading Phusion DNA polymerase (New England Biolabs) to minimize amplification errors. The 5' VDV1 cDNA fragment, positions 277-6333 nt, was generated using "Pr-VDV1-6300R" as a reverse transcription primer and "VDV1NotFseAsiSi-F" and "Pr-VDV1-6300R" as PCR primers (S1 Table). The 3' VDV1 cDNA fragment, positions 4925-10148, was generated using "VDV1-AsciPmel-A27R" as a reverse transcription primer and "Pr-VDV1-4800F" and "VDV1-AsciPmel-A27R" as PCR primers, the primer sequences are given in Supplementary Table 1. These RT-PCR fragments containing overlapping 5' and 3' parts of VDV1 cDNA were cloned into the plasmid vector pTOPO-XL vector (Invitrogen) according to the manufacturer's instructions to produce constructs pVDV1-12 and pVDV1-3, correspondingly. The cloned cDNA inserts were Sanger-sequenced to confirm integrity of the protein coding sequences and homology with the previously sequenced VDV1 isolates. The *NotI-HindIII* 4.9 kb fragment of pVDV1-12 was inserted into the *NotI-HindIII*-digested pVDV1-3 to produce a construct containing nearly full-length VDV1 cDNA clone, positions 277-10148 nt. Unique restriction sites *NotI* and *AsiSI*, which were introduced at the 5' end of the cloned cDNA, were used to insert synthetic DNA sequence "T7-Rib-VDV1-5end" corresponding to the first 284 nucleotides of VDV1 preceded by the T7 RNA polymerase promoter and the ribozyme sequences [3]. The resulting plasmid construct pVDV1-4, which contained introduced restriction site *AsiSI* in the IRES sequence at the position 277 nt, was linearized with *PmeI* restriction enzyme at the site located downstream the 3' terminal polyA sequence to generate the template for *in vitro* transcription. The *in vitro* transcription was carried out with T7 RNA polymerase (HighScript, New England Biolabs) for 3 hours at +37°C, the template plasmid DNA was removed by digestion with

RNAse-free Turbo DNase (Ambion), the full-length VDV1 transcripts were purified by RNeasy column (Qiagen).

To produce clone-derived VDV1 inoculum, 5 µg of the purified *in vitro* RNA transcript in 10 µL of phosphate-buffered saline (PBS), was injected into the hemolymph of purple eye honeybee pupae using syringes with a 0.3 mm 31G hypodermal needle G31 (BD Micro-Fine). The injected pupae were incubated 4 days at +33°C to allow development of the clone-derived virus infection and then were used to prepare tissue extracts containing the clone-derived VDV1 virus particles. The extracts were produced by homogenizing individual pupa with 1 mL of PBS, subjecting the homogenate to three cycles of freezing and thawing, clarifying extract by low-speed centrifugation (3000 rpm for 5 minutes), and filtering through a 0.22 µm nylon syringe filter. Concentrations of VDV1 and DWV was determined by qRT-PCR and identity of the clone-derived VDV1 was confirmed by sequencing and restriction digestion of the VDV1 IRES region.

# References:

1. Ryabov, E.V., Childers, A.K., Chen, Y., Madella, S., Nessa, A., vanEngelsdorp, D., Evans, J. D. (2017) Recent spread of Varroa destructor virus-1, a honey bee pathogen, in the United States. *Scientific Reports* 7: 17447. <https://doi.org/10.1038/s41598-017-17802-3> PMID: 29234127
2. Ryabov E.V., Childers, A.K., Lopez, D., Grubbs, K., Posada-Florez F., Weaver, D., Girtten, W., vanEngelsdorp, D., Chen, Y., Evans, J.D. (2019) Dynamic evolution in the key honey bee pathogen deformed wing virus: Novel insights into virulence and competition using reverse genetics. *PLoS Biology* 17:e3000502. doi: 10.1371/journal.pbio.3000502
3. Herold, J., Andino, R. (2000) Poliovirus requires a precise 5' end for efficient positive-strand RNA synthesis. *J. Virology* 74:6394–400. <https://doi.org/10.1128/jvi.74.14.6394-6400.2000> PMID: 10864650



**S2 Text.** Nucleotide sequence of the Varroa destructor virus-1 infectious cDNA construct (GenBank accession number MN249174).

```

LOCUS      Synthetic                10272 bp    mRNA    linear    VRL 29-JUL-2019
DEFINITION construct Varroa destructor virus 1-California-2016 infectious cDNA
           clone 4.
ACCESSION  Synthetic
VERSION
KEYWORDS   .
SOURCE     Varroa destructor virus 1
           ORGANISM Varroa destructor virus 1
               Viruses; Riboviria; Picornavirales; Iflaviridae; Iflavirus.
REFERENCE  1  (bases 1 to 10272)
           AUTHORS  Ryabov,E.V.
           TITLE    Full-length cDNA infectious clone of Varroa destructor virus-1, a
               pathogen of the honeybee, Apis mellifera
           JOURNAL  unpublished
REFERENCE  2  (bases 1 to 10272)
           AUTHORS  Ryabov,E.V.
           TITLE    Direct Submission
           JOURNAL  Submitted (29-JUL-2019) USDA-ARS Bee Research Laboratory, United
               States Department of Agriculture, Beltsville Agricultural Research
               Center, 10300 Baltimore Avenue, Bldg. 306, Beltsville, MD 20705,
               USA
COMMENT    Bankit Comment: Vecscreen Comment:Submitter says that this sequence
           is a Synthetic Construct
           Bankit Comment: ALT EMAIL:eugene.ryabov@ars.usda.gov
           Bankit Comment: TOTAL # OF SEQS:1

           ##Assembly-Data-START##
           Sequencing Technology :: Sanger dideoxy sequencing
           ##Assembly-Data-END##

FEATURES             Location/Qualifiers
     source            1..10272
                       /organism="Varroa destructor virus 1"
                       /mol_type="mRNA"
                       /cultivar="California CA-07-2016 (APHIS ID 2806)"
                       /isolate="California CA-07-2016 (APHIS ID 2806)"
                       /host="Apis mellifera"
                       /db_xref="taxon:232800"

```

```

/clone="pVDV1-California-2016-No-4"
/country="USA"
/collection_date="2016"
gene      89..10264
          /gene="Varroa destructor virus 1"
          /gene_synonym="VDV1 cDNA"
          /note="full-length cDNA copy of VDV1 genomic RNA"
          /nomenclature="Varroa destructor virus 1"
CDS       1242..9923
          /gene="Varroa destructor virus 1"
          /gene_synonym="VDV1 cDNA"
          /note="leader protein, structural proteins, non-structural
          proteins: helicase, protease, RNA-dependent RNA polymerase
          domains; [intronless gene]"
          /codon_start=1
          /product="Viral polyprotein"
          /translation="MAFSCGTL SYAAVAQAPSVAHAPRSWEIDEARRRRVIKRLALEQ
          ERIRNVLDVTVDHTTWEQEDARDNEFLTEQLNNLYTIYSIAERCTRRPVQEHVPISI
          SNRYSPLESLKIEVGKDAGEFVFKPKYTKICKKVKRVTSKFVREKVVRPVCNRSPL
          LFKIKKVIYDLHLRLKQVRLRREKQREYELECVTSLLQLSNPVSAPKPEMDNPNPG
          PDGEGEVELEKDSNVVLTTRQDPSTSIPAPTSVKWSRWTSNDVDDYATITSRWYQIA
          EFVWSKDDPFDKELARLILPRALLSSIEANSDAICDVPNTIPFKVHAYWRGDMEVVRQ
          INSNKFQVQQLQATWYYS DHENLNIQTKRSVYGFSHMDHALISASASNEAKLVIPFKH
          VYPFLPTRVVPDWTGILDMGTLNIRVIAPLRMSATGPTTCNVVVF IKLNNSEFTGTS
          SGKFYANQIRAKPEMDRVLNLAEGLLNNTVGGCNMDNPSYQQSPRH FVPPTGMHSLALG
          TNLVEPLHALRLDASGTTQHPVGCAPDEDMTVSSIASRYGLIRQVQWKDHAKGSLLL
          QLDADPFVEQKIEGTNPISLYWFAPGVGVSSMFMQWRGSLEYRFDI IASQFHTGRLIV
          GYVPGLTASLQRQMDYMKLKSSSYVFDLQESNSFTFEVPYVSYRPWWVRKYGGNYLP
          SSTDAPSTLFMYVQVPLIPMEAVSDTIDINVYVRGGSSFECVFPVQPSLGLNWNNTDFI
          LRNDEEYRAKNGYAPYYGGVWHSFNNSNSLVFRWGSASDQIAQWPTITVPRGELAF LR
          IRDAKQAAVGTQPWRTMVVWPSGHGYNIGIPTYN AERARQLAQHLYGGGSLTDEKAKQ
          LFVPANQQGPGKVSNGNPVWEVMRAPLATQQAHIQDFEFVEAVPEGEESRNTTVLDTT
          TTLQSSGFGRAFFGEAFNDLKTLMRRYQLYGQLLLSVTTDKDIDHCMFTFPCLPQGLA
          LDIGSAGSPHEIFNRCRDGI IPLIASGYRFYRGDLRFKIVFPSNVNSNIWVQHRPDRR
          LKGWSEAKIVNCDAVSTGQGVYNHGYASHIQITRVNNVIELEVPFYNATCYNYLQAFN
          PSSAASSYAVSLGEISVGFQATSDDIAAIVNKPVTIYYSIGDGMQFSQWVGYPMMIL
          DQLPAPVVRVAVPEGPIAKIKNFFHQTADEVREAQAAMREDMGIVVQDVIGELSQAIP
          DLQQPEVQANVFSLSQLVHAIIGTSLKTVAWAIVSIFVTLGLIGREMMHSVITVVKR
          LLEKYHLATQPQESANS GTVISAIPEAPNAEAEESAWVSI IYNGVCNMLNVAAQKPK
          QFKDWVKLATVDFSNNCRGSNQVFVFFKNTFEVLKKMWGVVFCQSNPAARLLKAVNDE
          PEILKAWVKECLYLD DPKFRMRRAHDQEYIERVFAAHSYGQILLHDLTAEMNQSRNLS

```

VFTRVYDQISKLKTDLMEMGSNPYIRRECFTICMGASGIGKSYLTDSLCSELLRASR  
 TPVTTGIKCVVNPLSDYWDQCFQVLCVDDMWSVETSTTLQKLNMLFQVHSPIVLS  
 PPKADLEGKKMRYNPEIFIYNTNKFPPFDRIAMEAIYRRRNVLIECKANEEKRGCK  
 HCENNIPIAECSPKILKDFHHIKFRYAHDVCNSETTWSEWMSYNEFLEWITPVYMANR  
 RKANESFKMRVDEMQLRMDEPLEGDNILNKYVEVNQRLVEEMKAFKERTLWADLQRV  
 GSEISTSVKKALPTISITERLPHWTIQCGIAKPEMDHAYEVMSSYAAGMNAEIEAHEQ  
 VRRSSLECQYIEPSTSRPLDEEGPTIDEELLGEVEFTSSALERLVDEGYITGKQKKYM  
 ATWCTKRREHVSDFDLVWTDNLRLVLSAYVHERSTSTRLSTDDVKLFKTI SMLHQR YDT  
 TDCAKCQHWYAPLTAIYVDDRKLFWCQKETKTLIDVRKLSKEDVTVQSKLINLSVPCG  
 DVCMLHSKYFNFLFHKAWLFENPTWRLIYNGTKKGMPPEYFMNCVDEISLDSKFCKVKV  
 WLQAIIDKYLTRPVKMIRDFLFKWWPQVAYVLSLLGIIGITAYEMRNPKSTAEDLAEH  
 YVNRHCNSDFWSPGMATPQGLKYSEAITAKAPRIHRLPVSTRPQGSTQQVDAVNKIL  
 QNMVYIGVVPKGP GSKWRDINFRCLMLHNRQCLMLRH YIESTAAPPEGTKYYFKYIH  
 NQETRM S GDISGIEIDL LSLPRLY YGGLAGEESFDSNIVLVTMPNRIPECKSIVKFIA  
 SHAEHARAQNDGVLVTGEHTQLLAFENNNKTPISINADGLYEVILQGVYTYPYHGDGV  
 CGSILLSRNLQRP IIGIHVAGTEGLHGFVAEPLVHEMFTGKAIESEREPEYDRVYELP  
 LRELDES DIGLDTDLYPIGRVDAKLHAQSPSTGIKKT LIHGTFDVRTEPNPMSSRDP  
 RIAPHDPLKLGCEKHGMP CSPFN RKHLELATTHLKEKLISVVKPINGCKIRSLQDAVC  
 GVPGLDGFDSISWNTSAGFPLSSLKPPGSSGKRWLFDIELQDSGCYLLRGM RPELEIQ  
 LTTTQLMRKKGIKPHTIFTDCLKDTCLPVEKCRIPGKTRIFSI SPVQFMIPRQYYLD  
 FMASYRAARLNAEHGIGIDVNSLEWTNLATSLSKYGTHIVTGDYKNFGPLSDSVAAS  
 AFEI I IDWVLNYTEEDDKDEM KRVMTMAQEILAPSHLCRDLVYRVPCGIPSGSPITD  
 ILNTISNCLLIRLAWQGITDLP LSEFSRHVVLCYGD LLMNVSD EMIDKFNAV TIGD  
 FFSRYKMEFTDQDKSGNTVRWRTLQTATFLKHGFLKHPTRPVFLANLDKVSIEGTTNW  
 THARGLGRRVATIENAKQALELAFGWGPEYFNHVRNTIKMAFDKLG IYEDLITWEEMD  
 VRCYASA"

BASE COUNT      3022 a    1647 c    2320 g    3283 t

ORIGIN

1 gcggccgcgg ccggccgcta taatacgact cactataggg attttaaact gatgagcccg  
 61 aaaggccgaa aaccgggtat cccgggttct ttaaaattcg ctatgggagg cgatttatgc  
 121 cttccatagc gaattacggt gcaactaaca attttagata gtagccatga acaaacatta  
 181 tgattactca ctacgtattg atcattttta caatgacttg cgtagcatga agcgcatgct  
 241 tgtagttata actatgttat tttgcaagtt ggagataatt gtattggatt atggatgcgt  
 301 gcactaagtg tctacatcta tagtcgtttg tggttcaagt ttttgtgta gtagtacaat  
 361 tttgagcgat cgcagtatcg tatgaatgat atttgaatga caaactgaa gtataaaata  
 421 tataaaatcc aaaaatat tttaatcttat tcagtgtagt gtttgataga gtagaatgcc  
 481 atgtgaccgc tcaaagaagt ccattatggg atatcattcg aagtcgaata ctttgtgata  
 541 gttattgtat tttattagta atattagtag tccgtaacta tcataatcct attatagttt  
 601 gattatatga tagaccactg cagtatcgag tagagttag aaagagtagt gcaatagtaa  
 661 gatcactgtc accgaccact cattgtaata gtgaggttcg tcggaaacca gttattgtgc  
 721 agcgactagc aatcgtgaat caatatagtt ggtattctaa atatgagacg attcggcgat

```

781 tttattgcga ctgaaatttc atatttagca tgtcaggctc tattatgaat gctcgagtat
841 ttattttctc ggtagagtag ggaccctctc atctctcagg tactgtatga ggcgaaagtg
901 tgaaagtaat ttatgtctct atacataagt gactgtattg ggatttcctt tggcaagaat
961 cttttcaata cagtataatt tatgccacgg tacgttacgt tcgcagggca ccggttaatg
1021 tcacatagcc cagacgatga cgaatggaaa gacattactt tttattttaa tgctacgatt
1081 attgctgttt tttttgctg ttttaatttg ctattatatt ttgctatttt cattattgct
1141 aaatataatt ctttgcattt tttgctttat atattagatt caattctttt tttttatat
1201 tttcaatttg attttgagtt tgaaggtaaa tatatataaa aatggcattt agttgtggaa
1261 ctctttctta tgctgctgtt gcccaagctc cctctgtagc tcatgctccc cgtagttggg
1321 agattgatga agctaggcgt cgacgcgtta ttaagcgttt ggcgttggaa caggaacgga
1381 ttcgaaatgt tcttgacgtc actgtgtatg atcatacaac gtgggagcaa gaggatgcgc
1441 gtgacaatga gttccttacg gaacaattga ataatttata tacgatatat tctatagctg
1501 aaagatgtac ccgcccgcct gttcaagaac atgtcccat ttcaatcagt aatagatatt
1561 cccctttaga atcccttaag attgaggtag gaaaagacgc aggtgagttc gtatttaaga
1621 aacccaaata tacaagatt tgtaagaaa tgaaacgggt gacatcaaaa tttgtgcgcg
1681 agaaagtgtg taggcccgtt tgtaatcgat cgcctatggt attattttaa attaagaaag
1741 taatatatga tttacatttg tatcggttac ggaacaagt tcggcttctc agacgcgaaa
1801 aacagcgtga atatgagtta gagtgtgta ctagtgtgct acagtatatc aatcctgttt
1861 cagctaaacc tgagatggac aatcctaata ctgggtccaga tggatgaagg gaagtgaat
1921 tagaaaagga tagtaatgta gtattaacta cacaacgtga tctagtagcc tctattcctg
1981 ctccaactag tgtgaagtgg agtagatgga ccagtaatga tgtgtgggat gattatgcca
2041 ctataacttc gcgttggtat caaattgccg aatttgtatg gtcaaaggat gatccatttg
2101 ataaggaatt ggcgcgctta attttacctc gagctttggt atctagtatt gaggctaatt
2161 ctgacgctat ttgtgatgta cctaatacta ttccgtttaa ggtacatgca tattggcgtg
2221 gagatatgga agttcgagtg cagattaact cgaataaatt ccaggttggt caattacagg
2281 caacttggtg ctattcggat catgaaaatt tgaatatcca gacgaagcga agtgtgtatg
2341 gtttttcgca tatggatcat gctctgatta gcgcacagc gagtaatgaa gcaaaattag
2401 tgataccttt taaacacgta tatccattct taccacgcg tgcgttcctt gattggacaa
2461 ctgggtattct tgatatgggt accctaaata ttcgtgtaat tgctccacta cgtatgagtg
2521 cgacgggacc aaccacttgt aatgtgttag tatttattaa gttaaataat agtgaattta
2581 ctgggtacttc ttctggtaag ttttacgcga atcaaattag ggcaaacctt gaaatggacc
2641 gtgtgctaaa tttggcagaa ggattactaa ataatactgt aggtggtgtg aatatggata
2701 atccgctata tcagcaatct ccgcgtcatt ttgttcttac tggatgcat agtttagctt
2761 taggcactaa tttagtagag cctttgcatg cattacgatt agatgcatca ggtacaacac
2821 aacatccagt tgggtgtgct cctgatgaag atatgactgt atcttccatt gcatcacgat
2881 atggtttaat tcgccaagtg caatggaaga aagaccatgc gaaaggatca ttattattac
2941 aacttgatgc tgatccttct gttgaacaga aaattgaggg aaccaatcca atttctttgt
3001 attggttttg tccggttgga gtcgtatcta gtatgttcat gcaatggaga ggttctttag
3061 aatatagatt tgatattata gcttcccaat ttcatacggg taggttaatt gtaggttatg
3121 ttcttgact gactgcttct ttacaacgtc aaatggacta tatgaaattg aagtcattca
3181 gttatgtggt gtttgattta caggaaagta atagttttac gtttgaagtg ccctatgtgt

```

3241 catacagacc gtggtgggtg cgtaagtatg gtggaatta tctgccatct tctactgatg  
3301 cgcctagcac actgtttatg tatgtacaag taccattgat acctatggaa gctgtttctg  
3361 atactataga tatcaatgtg tatgtgcgtg gtggcagttc gtttgagggt tgtgttccag  
3421 tccaacctag tttagggttg aactggaata cagatttcat attacgtaat gatgaggagt  
3481 accgcgcaaa gaatggatat gcaccatatt atggtgggtg gtggcatagc ttcaataata  
3541 gtaattcgct tgtttttaga tggggttcgg cttcagatca aattgctcaa tggccaacaa  
3601 taacagtgcc tcgaggagag ttagcattcc tgcgtatccg cgatgctaag caagctgctg  
3661 taggaacgca acctggcgt actatggctg tttggccttc aggtcatgga tataatattg  
3721 gaataaccaac ttataatgct gaacgagcaa gacaacttgc tcagcatttg tatggtgggtg  
3781 ggtctttgac agatgaaaaa gctaagcaat tatttgtgcc tgctaaccag caaggaccgg  
3841 gcaaagtaag taatggtaac ccgctctggg aagtaatgcg cgcgcctctt gcaactcagc  
3901 aagcgcatac acaagatttt gaatttggtt aagctgttcc agaaggcgaa gaatcacgca  
3961 aactacggt gctagacacg acaacaacgt tacagtctag cggatttggg cgcgctttct  
4021 tcggtgaggc atttaacgat cttaagacgt taatgcgccc ataccaatta tatggtcaat  
4081 tattgtttac cgttactacg gataaggata ttgatcattg tatgtttacc tcccttggt  
4141 tacctcaagg gttagcggtt gatatagggt cggctggatc gcctcatgaa atatttaac  
4201 gctgcctga tggtatcatt ccgttgatag cgtcagggtt tcggttttat cgaggcgatt  
4261 tacggttcaa aattgttttc ccaagtaacg ttaatagcaa tatttgggtt caacatcgac  
4321 cagatcgtag attgaaagga tggctgaag cgaaaatagt aaactgtgat gctgtatcta  
4381 ctggacaagg tgtttataat catggatatg ctagtcatat tcagattacg cgtgtaaata  
4441 atgttataga attggaagtc ccgttttata acgctacgtg ctataattat ttgcaagcgt  
4501 ttaaccctac tagtgacgag tcgagttatg ccgtttcgct cggagagatt tcggttggtt  
4561 ttcaagctac tagtgatgac attgcagcca tagttaataa acctgtaact atatattaca  
4621 gtattggcga tggtagcag ttttcgcagt gggttggtt tcaaccaatg atgattctag  
4681 accaattgcc agcaccagta gttagggtg tgctgaggg ccctatagcg aagataaaga  
4741 actttttcca ccaaacggca gatgaagttc gagaagctca ggccgcaaag atcggtgaag  
4801 atatgggtat agtagtccaa gacgttatag gagagttaag tcaggctata cccgatcttc  
4861 aacaaccgga agttcaagcg aatgtttttt ctctggtgtc acagttatg catgctatca  
4921 tcggtactag tcttaagaca gttgcttggg cgattgtttc gatttttgta actttagggt  
4981 tgattggacg tgaatgatg cattcagtca taactgtagt taagcggta ttagaaaaat  
5041 atcacttggc gacgcaacc caggaatccg ccaattcagg tacggttatt tccgctattc  
5101 cagaagcacc caatgctgaa gcagaggagg ccagtgcctg ggtatccatt atttataatg  
5161 gtgtgtgtaa tatgttgaat gtagccgctc aaaaaccgaa acaatttaaa gattgggtaa  
5221 aattagctac cgtagatttt agtaataatt gtagaggtag taatcaggta tttgtgtttt  
5281 tcaagaatac gtttgaagtg ttgaagaaaa tgtgggggtt tgtgttttgt cagagtaatc  
5341 ctgcagcgcg actcttgaag gcagtgaatg acgaacctga gattttaaaa gcgtgggtta  
5401 aagaatgtct gtatttagat gatcctaaat ttagaatgag acgtgcgcat gatcaagagt  
5461 atattgagag agtgtttgag gccattcgt atggacaaat tttattgcat gacttaacgg  
5521 ctgaaatgaa tcaatcgctg aatttaagtg tgtttacgag agtgtatgat caaatatcta  
5581 aattgaagac ggatctcatg gaaatgggat caaacccata tatcaggcgt gaatgcttta  
5641 cgatttgtat gtgtggtgca tctggaattg gtaagtotta ttttaactgat tctttatgca

5701 gcgagctctt acgtgcgagt cgtactccag tgacaacggg cattaagtgt gtcgtgaacc  
5761 ctttgtctga ttattgggat cagtgtgatt ttcagcccg tttatgtgtt gatgacatgt  
5821 ggagtgttga aacgtctact acgctcgata aacagttaaa tatgttattc caggttcatt  
5881 caccaattgt actttcaccg cctaaagctg atttagaagg taagaaaatg cgttataatc  
5941 ctgaaatatt catatataat acgaataaac cttttccgag gtttgatcgt atagctatgg  
6001 aagctattta tcgacgtaga aacgttttaa ttgaatgtaa ggctaataaa gagaagaagc  
6061 gtggatgtaa acattgtgag aataatatac ccattgctga atgtagtcca aaaatsttga  
6121 aagatsttca tcacattaaa tttcgttatg ctcatgatgt gtgtaattct gaaactacgt  
6181 ggtctgagtg gatgtcgtat aatgaatttt tggaaaggat tactcctgta tatatggcta  
6241 atcgacgtaa agcaaatgaa tcgtttaaga tgcgtgttga tgaaatgcaa atgttgcgta  
6301 tggatgagcc cttggaaggc gataatattt taaataagta tgttgaagtt aatcagcgct  
6361 tagttgagga aatgaaagct tttaaagagc gaaccctttg ggctgattta caacgtgttg  
6421 gtcagagat tagtacttca gttaagaaag cattaccaac tatttccatt actgagaggc  
6481 taccacattg gactatccaa tgtggcatag ctaagcctga aatggatcat gcttatgaag  
6541 ttatgagttc atatgcagca ggaatgaacg cagaaattga agcgcatgaa caagtctgc  
6601 gttcttcttt ggaatgtcag tatattgagc cttcaacttc aagacctctg gatgaagagg  
6661 gtcctactat cgacgaggaa ttacttggcg aagtagaatt tacttcttca gctttggagc  
6721 gtttggttga tgaggggtat attactggta aacaaaagaa gtatatggca acttggtgta  
6781 cgaaacgaag agagcatgta tccgattttg atttagtatg gacggataat ctgctgtttt  
6841 tgagtgcgta tgtccacgag cgttctacat ctacgcgttt atctaccgat gatgttaaat  
6901 tatttaagac gattagtatg ttacatcaga ggtatgatac cactgattgt gcaaatgcc  
6961 aacattggta tgcaccatta acagctattt atgttgatga tagaaagcta ttttgggtgc  
7021 agaaggagac taagactttg atagatgttc gtaaattgtc gaaagaggat gttacagtcc  
7081 aatcgaaatt aattaactta tcggttccgt gcggtgatgt gtgtatgtta cattctaaat  
7141 actttaatta tttattccat aaagcgtggt tgtttgaaaa tccaacatgg cgtttaatat  
7201 ataattgtac taagaaaggt atgcctgagt atttcatgaa ttgcgtggat gaaatttcat  
7261 tagattcaaa attttgtaaa gtaaagggtt ggcttcaagc aattattgat aaatatttga  
7321 ctgctccagt gaaaatgatt cgtgactttt tatttaaatg gtggccgcaa gtagcatagc  
7381 tgtaagttt gttaggatata attggtataa ctgcgtatga aatgcgtaat cctaaatcaa  
7441 cagcagaaga cttggctgag cactatgtta ataggcattg taattcagat ttttggtcac  
7501 caggtatggc gacgcctcag ggattaaaa atagtgaagc gataacagct aaagcgcta  
7561 gaatccatag attgccggt agtactagac ctacgggac aacgcagcaa gtggacgccg  
7621 ttgtgaataa gattttgcag aatatggtgt atatcggtgt tgtatttcca aaagggcctg  
7681 gtagtaagtg gcgagatatt aatttttagat gtcttatgct tcataatcgg caatgtttga  
7741 tgttgcgga ttacattgag tcgacggctg cttttccgga gggtaacaaa tactatttta  
7801 agtatattca taatcaagaa actcgaatgt caggtgatat atctggtatt gagattgatt  
7861 tattgagttt acctagattg tattatggtg gcttagcggg ggaagagtcg tttgatagca  
7921 ataatgtgt agtaactatg ccgaatagaa ttcctgagtg taagagtatt gtgaagttta  
7981 tagcttcaca tgctgaacat gctcgtgctc aaaatgatgg tgtgttagtt actggtgaac  
8041 atactcagtt attggcgctc gagaataata ataaaacacc tataagtatt aatgctgatg  
8101 gtttgatgta ggttatactt caaggagtat acacttatcc ataccatggt gatggtgttt

8161 gtgggtctat attattgtct cgtaatttac aacgaccgat tatagggatc catgtagctg  
8221 gtactgaagg attacatggc tttggtgttg ctgaacctct tgttcattgag atgttcactg  
8281 ggaaagcaat agagagtga agggaaccgt atgatcgtgt gtatgaatta cctttgctg  
8341 aattagatga atctgatata ggtttagata ctgacttata tcttatagga agagttgatg  
8401 cgaaattagc tcatgcccac agtccttcaa caggaaattaa aaagacgctt attcatggta  
8461 cttttgatgt tcggactgaa ccgaaccgca tgtcatcacg agaccaaga atagcgccac  
8521 atgatccgtt gaagttaggg tgtgagaaac atggtatgcc atgttctcca tttaatcgaa  
8581 aacatttga attagcaaca actcatttaa aggagaagtt aatttccgta gttaaaccta  
8641 taaacggatg caagattaga agtttgcagg atgctgtgtg tgggtgacca gggttgatg  
8701 gctttgatcc aatatcctgg aatactagtgt ctggttttcc tttatcttca ttaaaaccgc  
8761 caggctcttc tggtaaacga tgggtgtttg atattgaatt acaagattca ggatgttatc  
8821 ttttgagagg gatgagacct gaacttgaga tacagttgac aacaactcag ttaatgagga  
8881 agaaggggaat aaagcctcac actatattca cggattgttt gaaagataca tgtttgcctg  
8941 tggaaaaatg cagaatacct ggtaagacta gaatatttag tataagtccc gtccaattta  
9001 tgattccatt tcgacaatac tatctcgatt ttatggcgtc gtaccgtgcc gctagactta  
9061 atgctgagca tggaaatagg atagacgtga acagcttga atggacaaac ttggcaacaa  
9121 gtctgtcgaa gtatggcacg catattgtga caggagatta caagaatttt ggtcctgggt  
9181 tagattctga tgttgccgct tcagctttcg aaattatcat tgattgggtg ttaaattaca  
9241 ctgaagaaga tgataaagac gaaatgaagc gtgtaatgtg gactatggct caggaaatct  
9301 tagctcctag tcaattatgt cgtgatttag tatatcgcgt accatgcggt attccttctg  
9361 gatcaccaat tacggacatt ttgaatacta tttcgaattg tttgttaatt cgattggctt  
9421 ggcaaggat tactgatttg cttttatccg aattttctag acatgtcgtg ctagtgtgtt  
9481 atgggtgatg tctcatcatg aatgtaagt atgagatgat agataaattc aacgctgtaa  
9541 caattggcga tttcttttcg cgatataaga tggaaattac ggatcaggat aaatctggaa  
9601 atacagtgcg gtggcgaact ttacaaactg ccacgttttt gaagcatggg ttcttgaaac  
9661 atccaacaag acccgtgttt ctagccaatc tggataaggt ttctatagaa ggaacaacca  
9721 attggacaca tgctcgagga ttgggtcgtc gagtagcaac cattgagaat gctaaacaag  
9781 cgctagagtt ggcattcgga tggggtcccg aatactttaa tcatgttcgg aataccatta  
9841 aaatggcatt cgacaagtta ggtatttatg aggatctcat cacatgggaa gaaatggatg  
9901 ttagatgtta tgctagcgcg taattttaag attttaatac tcattaaaat taatttgtat  
9961 ttaggttatt ggaattgagg gaagtaccac cccccaagac cttcgtttta aatctactaa  
10021 gaggagtga cttgcataa agagtctaaa agcagagtgg attagaccac cacttttagc  
10081 ttatatgtga ggaagggtga gttgcctcta aagactcagc tccgtagtag agtagtttta  
10141 gttacgatta aagtggtagt ctaggttagg tgttactcgc gtattgtcgc ataacggcaa  
10201 tgcgtcctaa ttttagtata gttttaacca taatagtaaa aaaaaaaaaa aaaaaaaaaa  
10261 aaaagtttaa ac

//

**S1 Video.** Varroa feeding on artificial diet artificial supplemented with the particles of honey bee viruses.

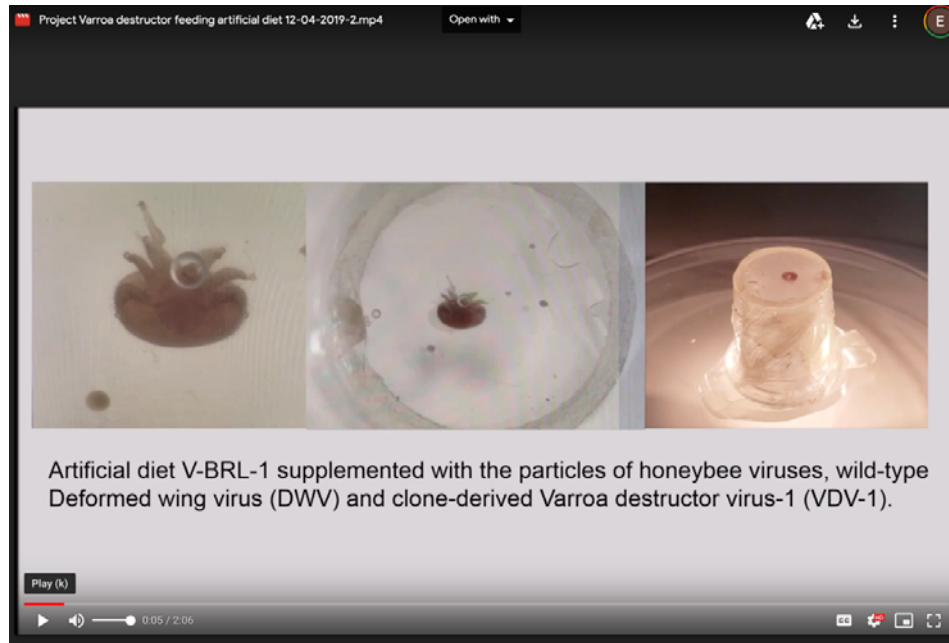

[https://nam03.safelinks.protection.outlook.com/?url=https%3A%2F%2Fdrive.google.com%2Ffile%2Fd%2F1aFiom29lH97cVUy9vRY208jneWwt10q7%2Fview%3Fusp%3Ddrive\\_web&data=02%7C01%7Cdsonensh%40odu.edu%7C679367106dab464247ee08d7794371bc%7C48bf86e811a24b8a8cb368d8be2227f3%7C0%7C0%7C637111202889055687&sdata=HOqFR%2BQZjqbbNaxKZC7cTwM7FdrK2u7v7nX2yC5bk%3D&reserved=0](https://nam03.safelinks.protection.outlook.com/?url=https%3A%2F%2Fdrive.google.com%2Ffile%2Fd%2F1aFiom29lH97cVUy9vRY208jneWwt10q7%2Fview%3Fusp%3Ddrive_web&data=02%7C01%7Cdsonensh%40odu.edu%7C679367106dab464247ee08d7794371bc%7C48bf86e811a24b8a8cb368d8be2227f3%7C0%7C0%7C637111202889055687&sdata=HOqFR%2BQZjqbbNaxKZC7cTwM7FdrK2u7v7nX2yC5bk%3D&reserved=0)
